# Supplementary material for: Conjugated Oligo-Aromatic Compounds Bearing a 3,4,5-Trimethoxy Moiety: Investigation of Their Antioxidant Activity Correlated with a DFT Study
Source: PubMed Central journal article supplement (PMC6274057; doi:10.3390/molecules21020224), 2016-02-17
Supplement: molecules-21-00224-s001.pdf [file molecules-21-00224-s001.pdf]

# Supplementary Material: Conjugated Oligo-Aromatic Compound Bearing a 3,4,5-Trimethoxy Moieties: Investigation of Their Antioxidant Activity Correlated with a DFT Study

Huda. S. Kareem <sup>1,2</sup>, Nurdiana Nordin <sup>1</sup>, Thorsten Heidelberg <sup>1</sup>, Azlina Abdul-Aziz <sup>3</sup> and Azhar Ariffin <sup>1,\*</sup>

<sup>1</sup>H- and <sup>13</sup>C-NMR

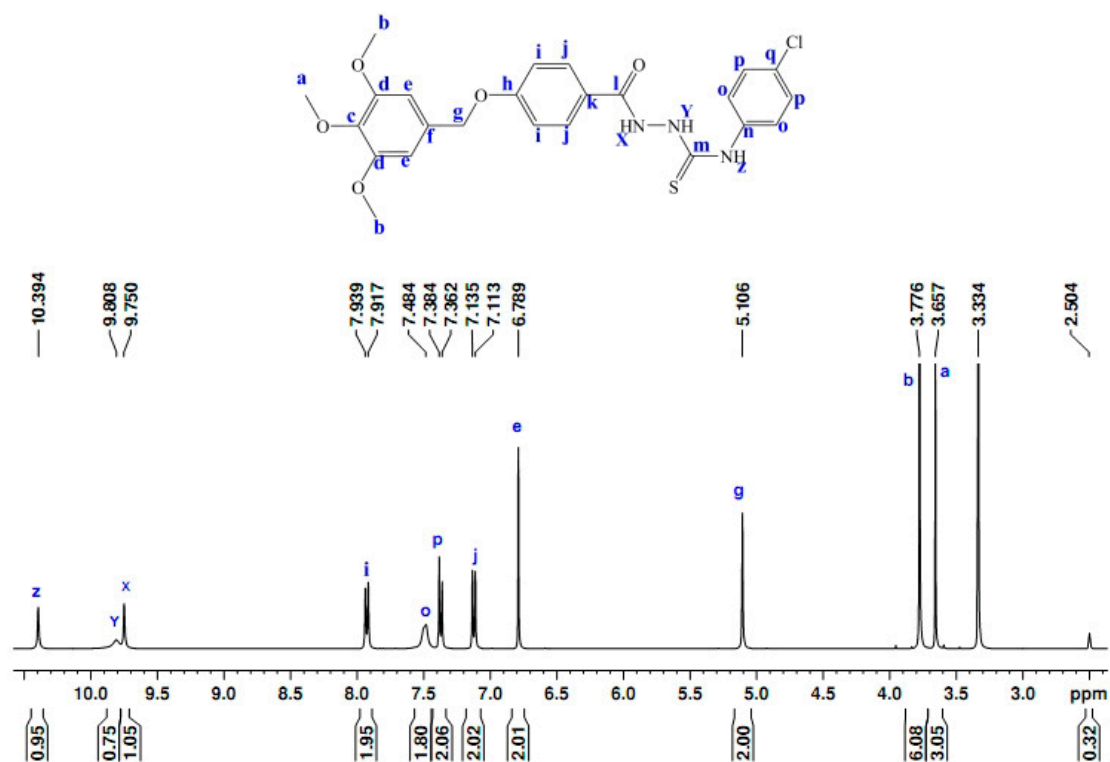

Figure S1. <sup>1</sup>H spectrum (DMSO-*d*<sub>6</sub>, 400 MHz) of 3a.

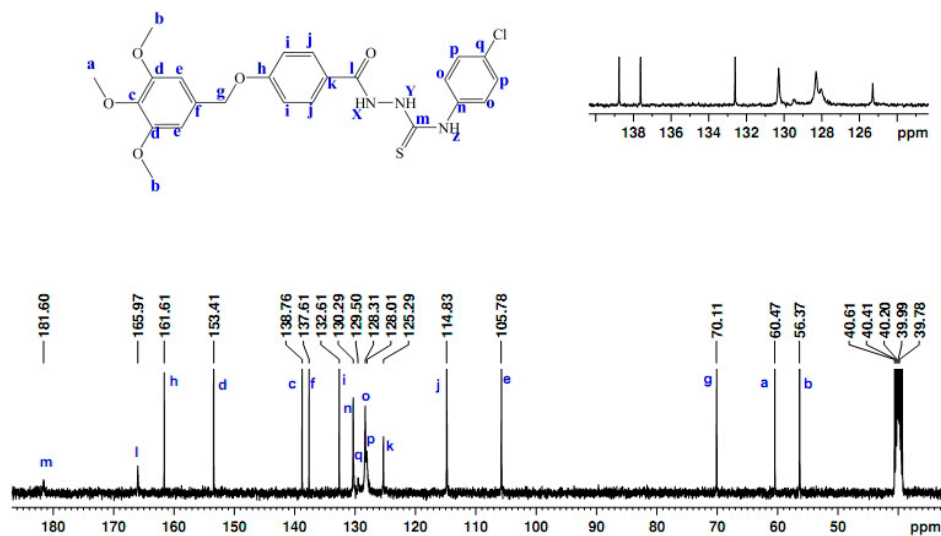

Figure S2. <sup>13</sup>C spectrum (DMSO-*d*<sub>6</sub>, 100 MHz) of 3a.

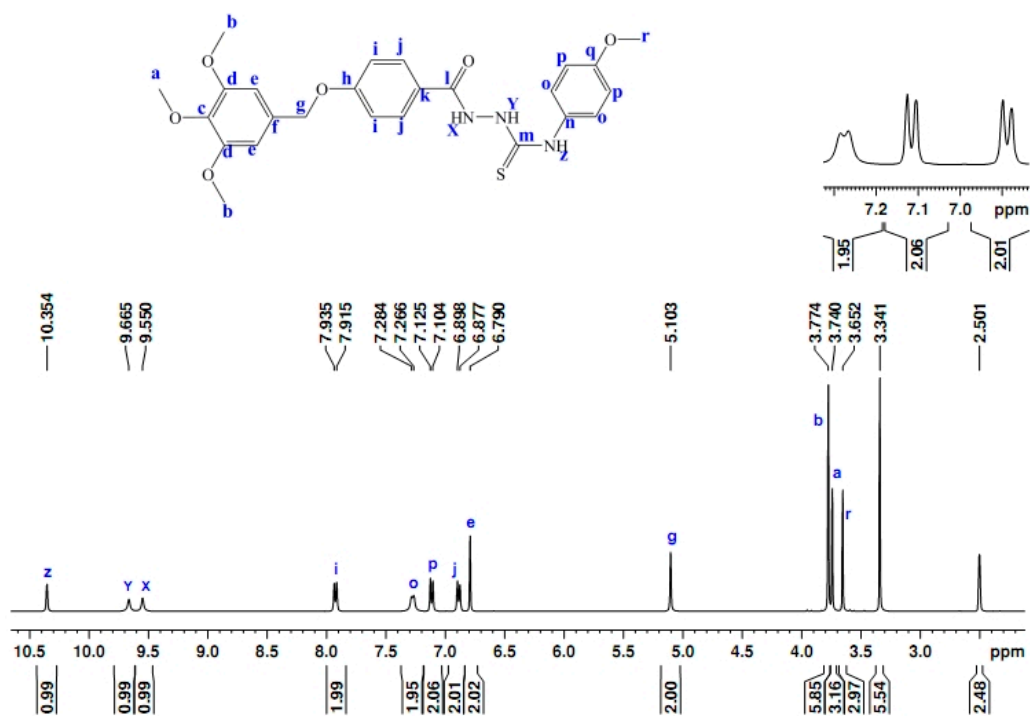Figure S3.  $^1\text{H}$  spectrum ( $\text{DMSO-}d_6$ , 400 MHz) of **3b**.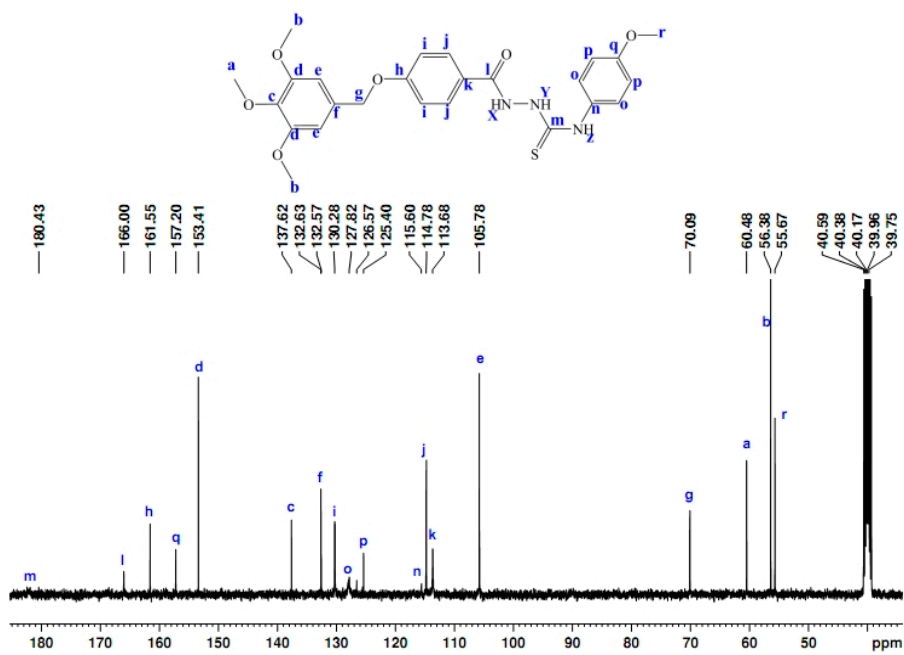Figure S4.  $^{13}\text{C}$  spectrum ( $\text{DMSO-}d_6$ , 100 MHz) of **3b**.

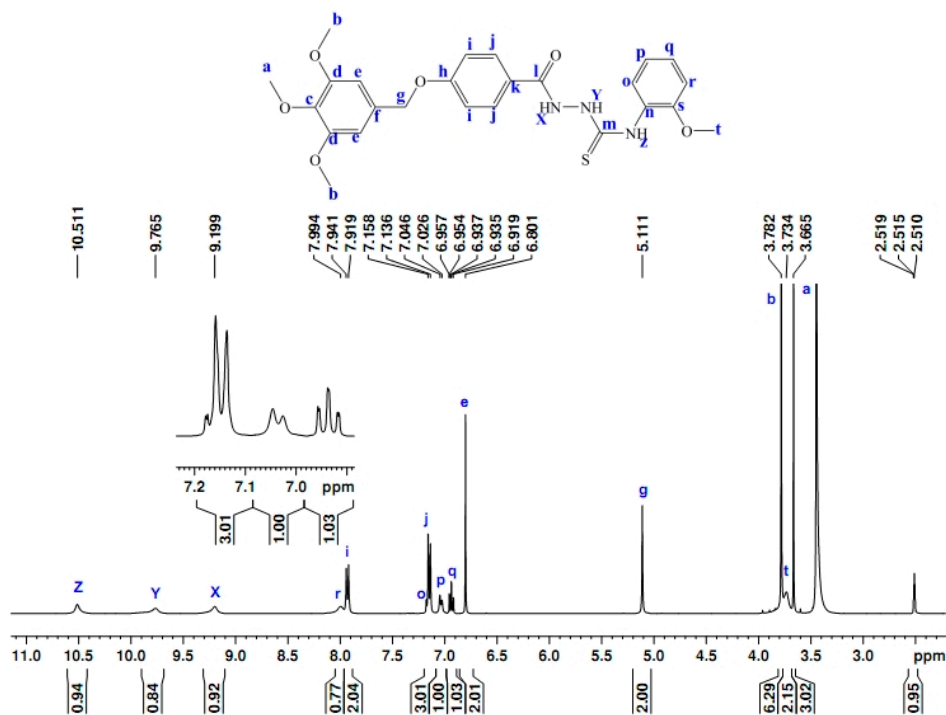Figure S5.  $^1\text{H}$  spectrum (DMSO- $d_6$ , 400 MHz) of 3c.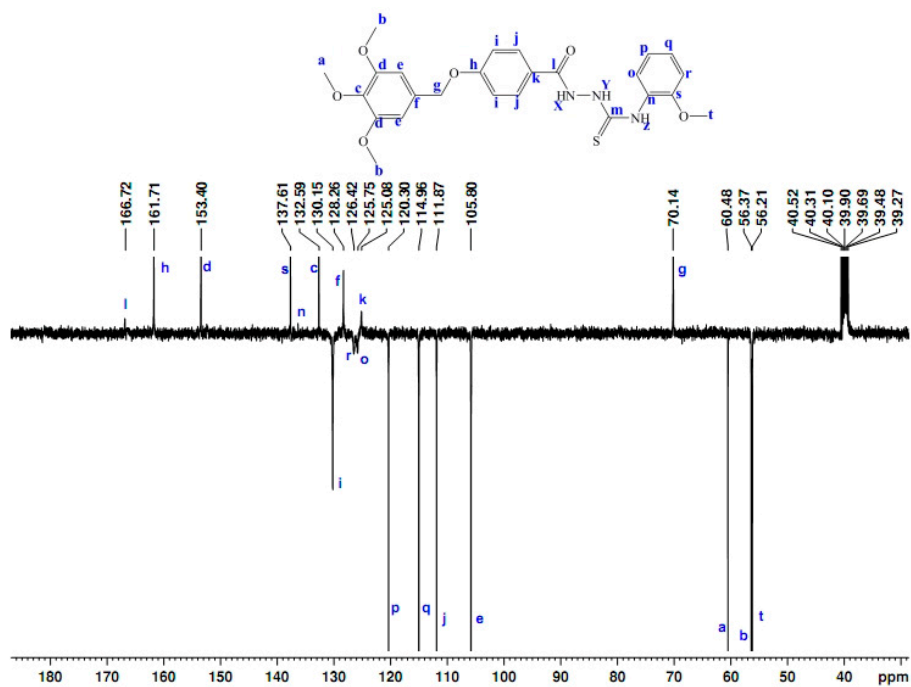Figure S6.  $^{13}\text{C}$  spectrum (DMSO- $d_6$ , 100 MHz) of 3c.

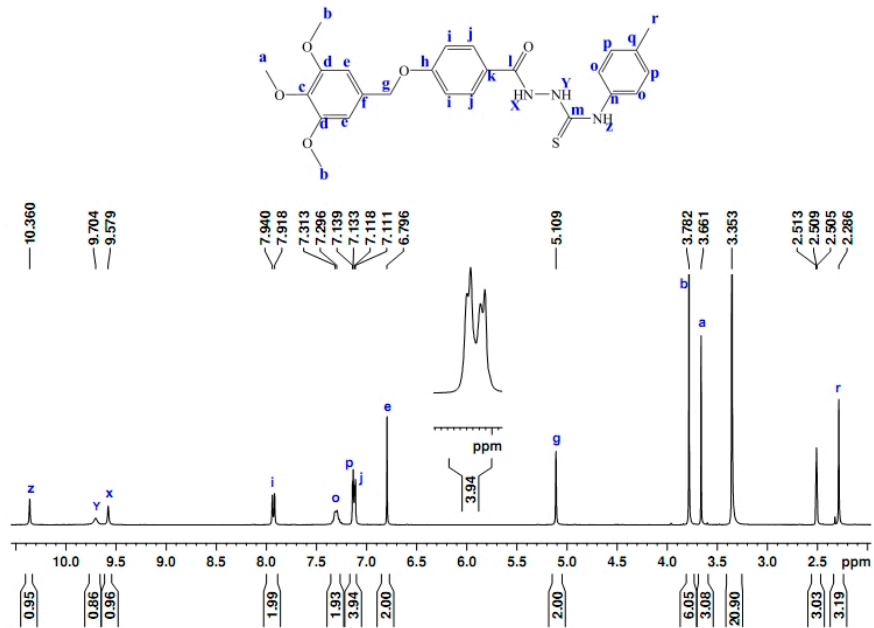Figure S7.  $^1\text{H}$  spectrum (DMSO- $d_6$ , 400 MHz) of 3d.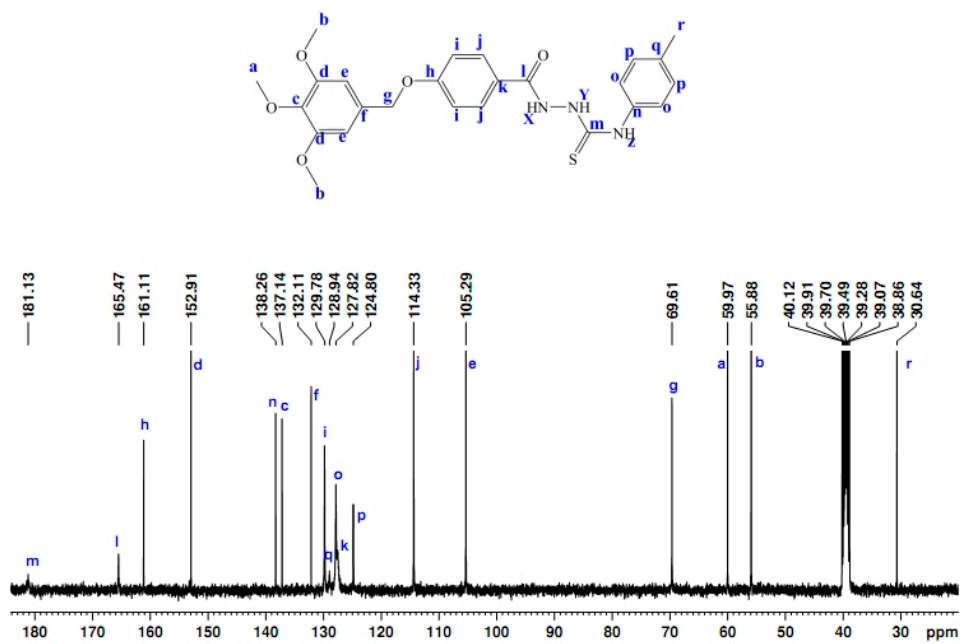Figure S8.  $^{13}\text{C}$  spectrum (DMSO- $d_6$ , 100 MHz) of 3d.

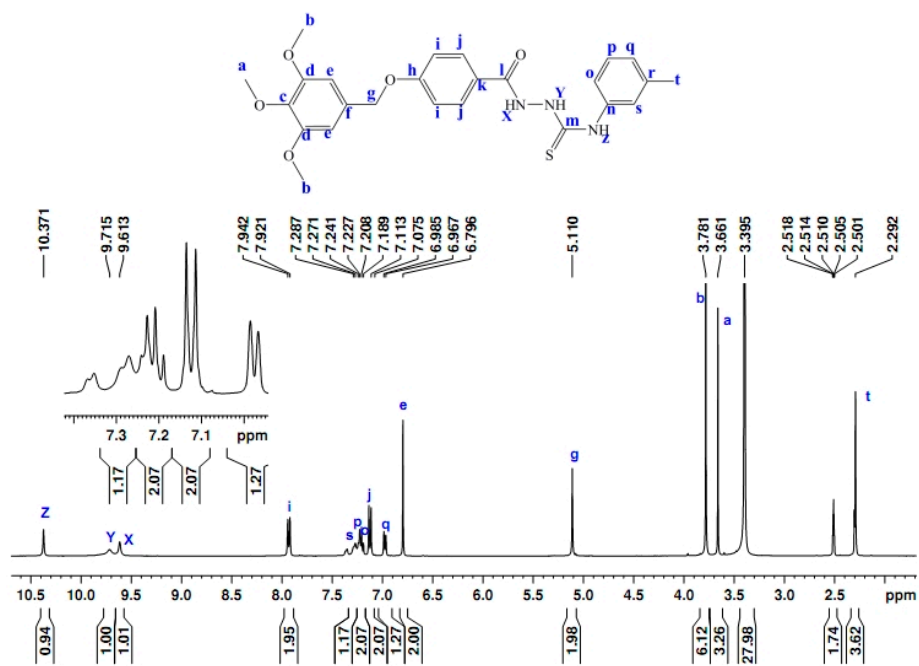Figure S9.  $^1\text{H}$  spectrum (DMSO- $d_6$ , 400 MHz) of 3e.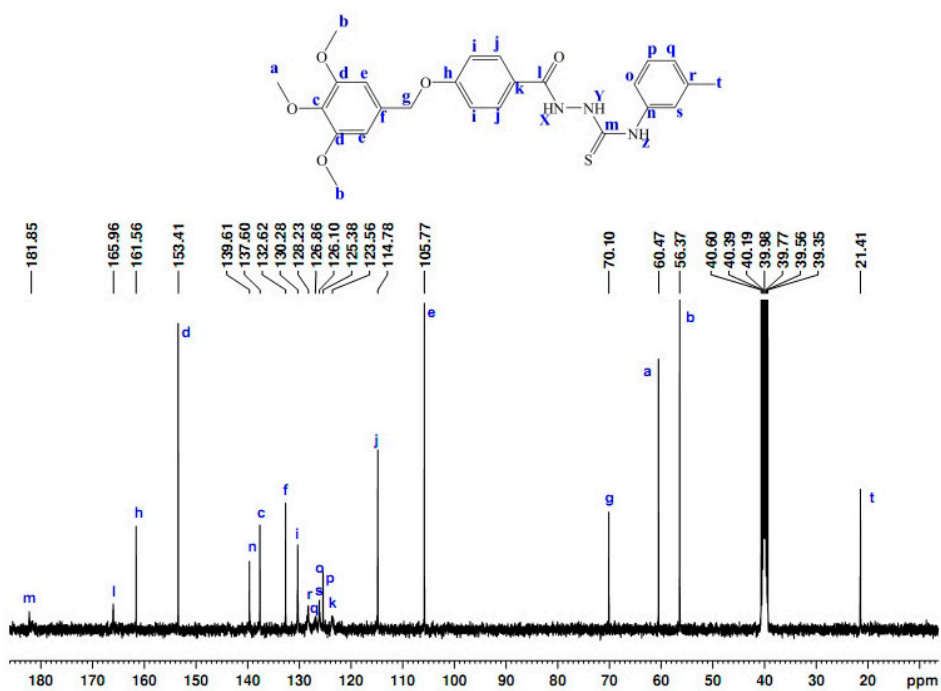Figure S10.  $^{13}\text{C}$  spectrum (DMSO- $d_6$ , 100 MHz) of 3e.

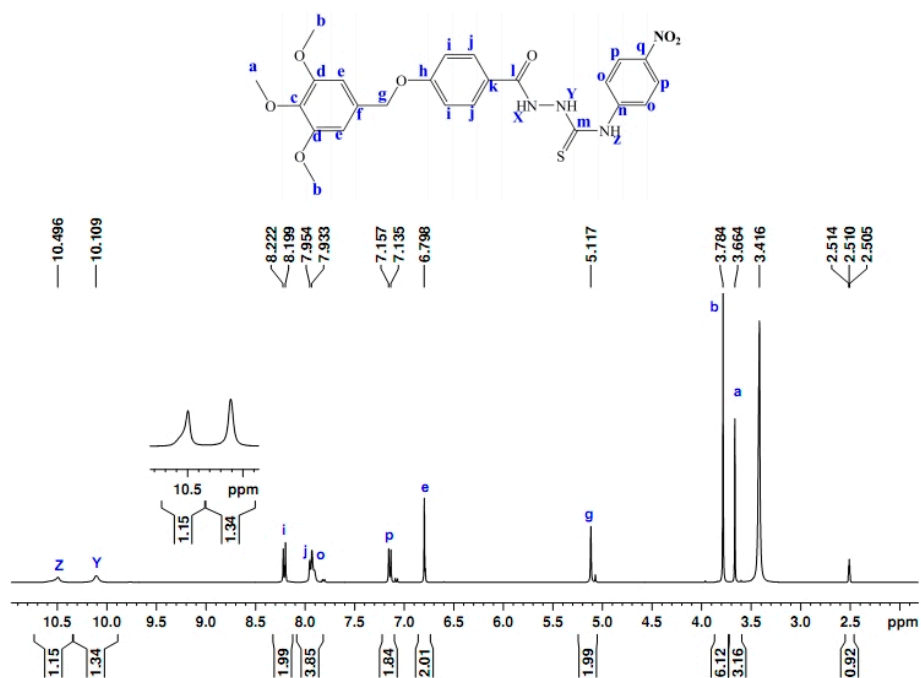Figure S11. <sup>1</sup>H spectrum (DMSO-*d*<sub>6</sub>, 400 MHz) of 3f.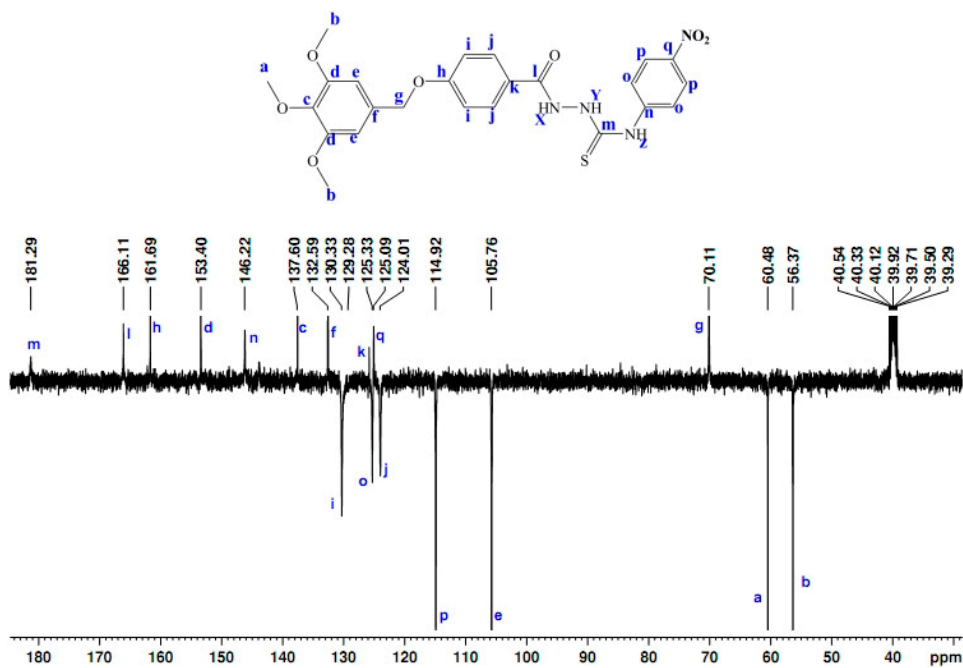Figure S12. <sup>13</sup>C spectrum (DMSO-*d*<sub>6</sub>, 100 MHz) of 3f.

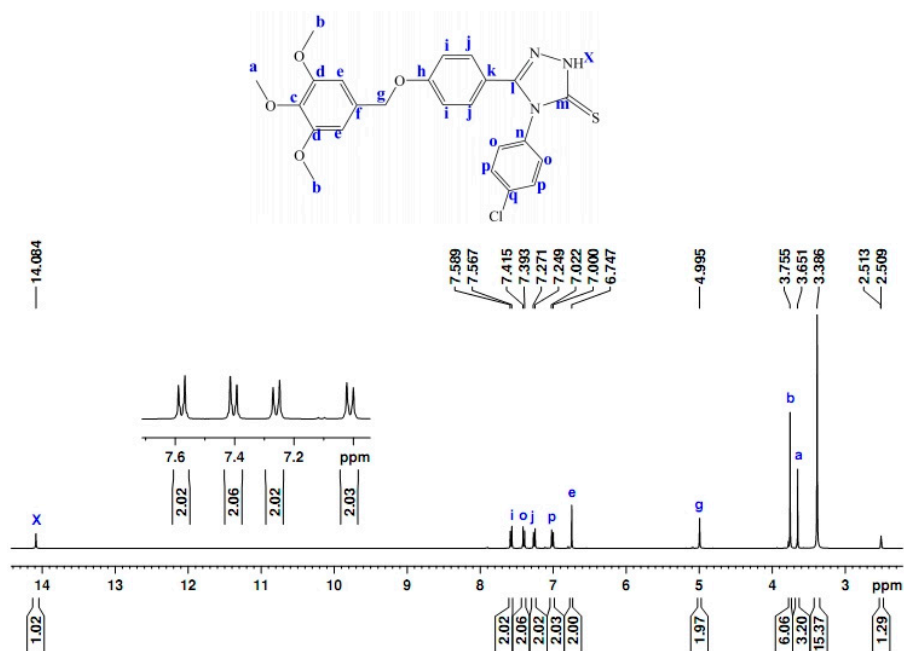Figure S13.  $^1\text{H}$  spectrum ( $\text{DMSO-}d_6$ , 400 MHz) of **4a**.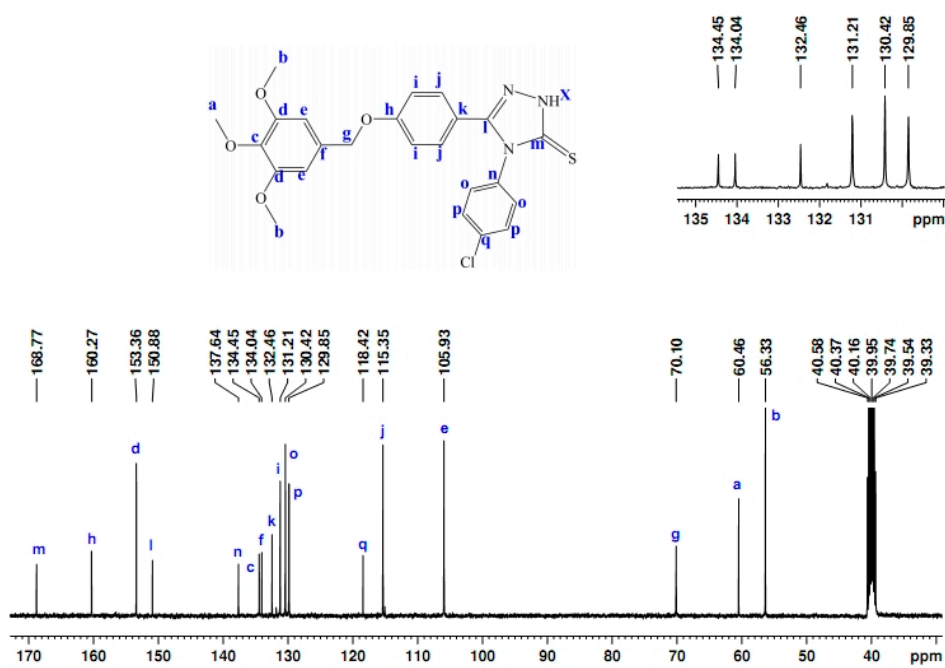Figure S14.  $^{13}\text{C}$  spectrum ( $\text{DMSO-}d_6$ , 100 MHz) of **4a**.

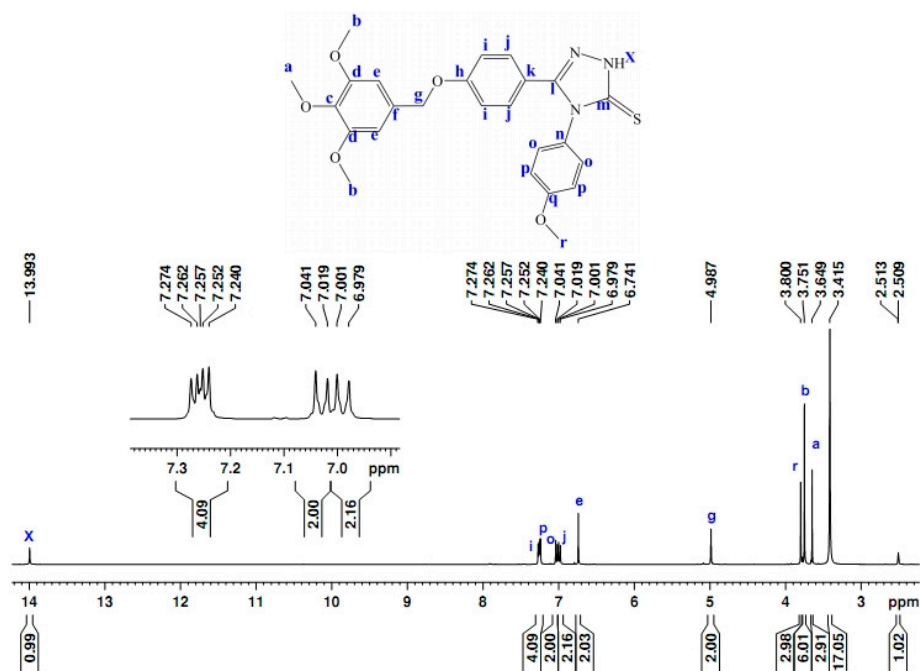Figure S15.  $^1\text{H}$  spectrum (DMSO- $d_6$ , 400 MHz) of 4b.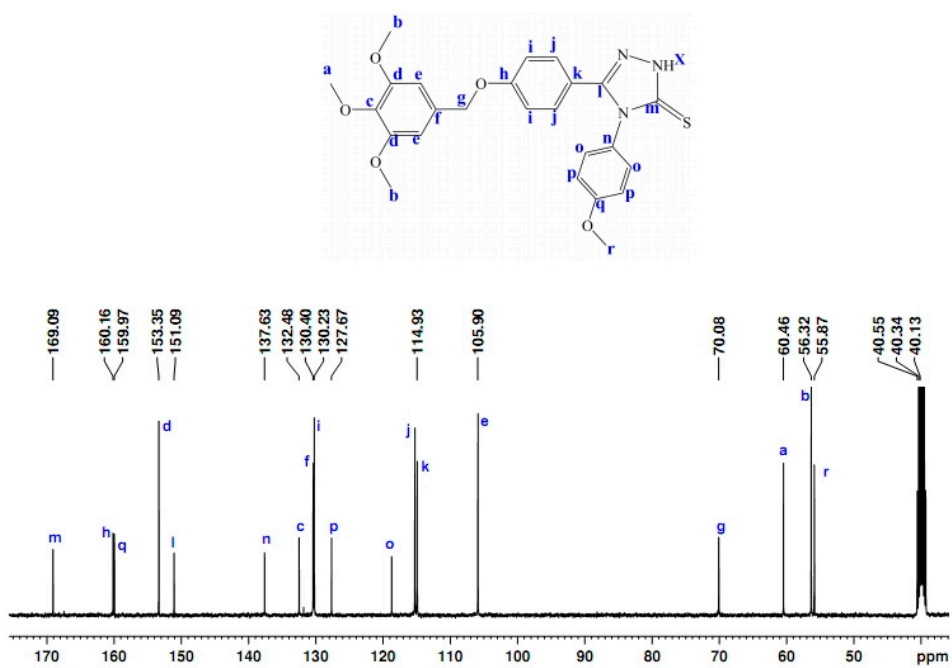Figure S16.  $^{13}\text{C}$  spectrum (DMSO- $d_6$ , 100 MHz) of 4b.



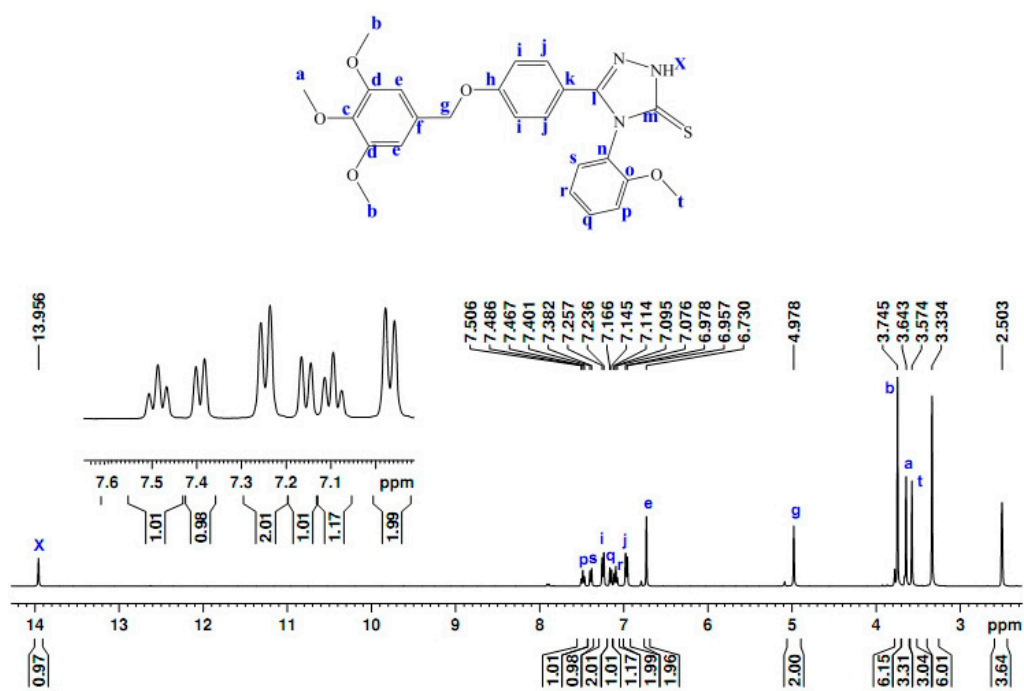Figure S17.  $^1\text{H}$  spectrum (DMSO- $d_6$ , 400 MHz) of 4c.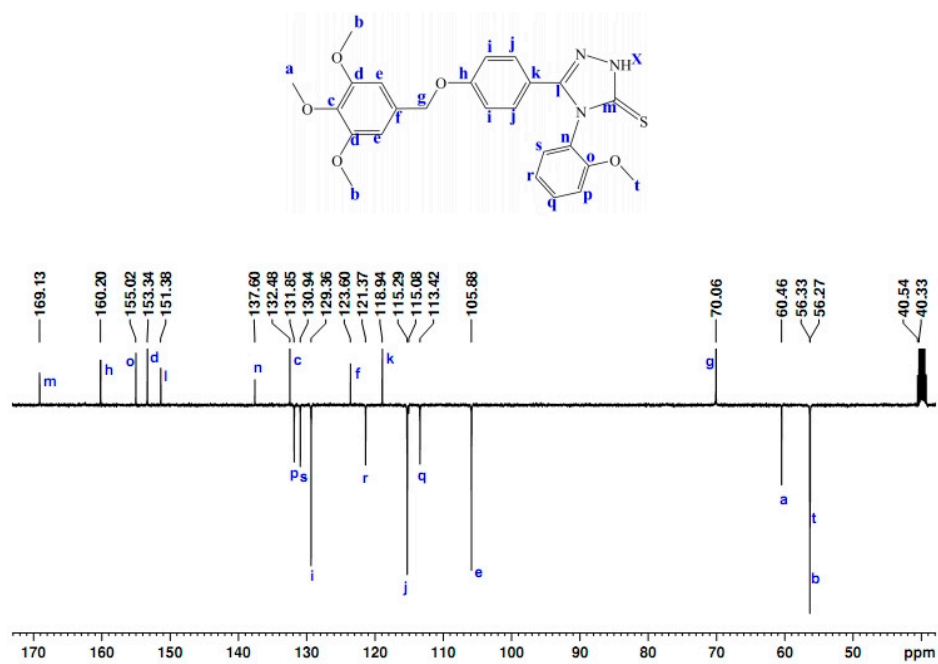Figure S18.  $^{13}\text{C}$  spectrum (DMSO- $d_6$ , 100 MHz) of 4c.

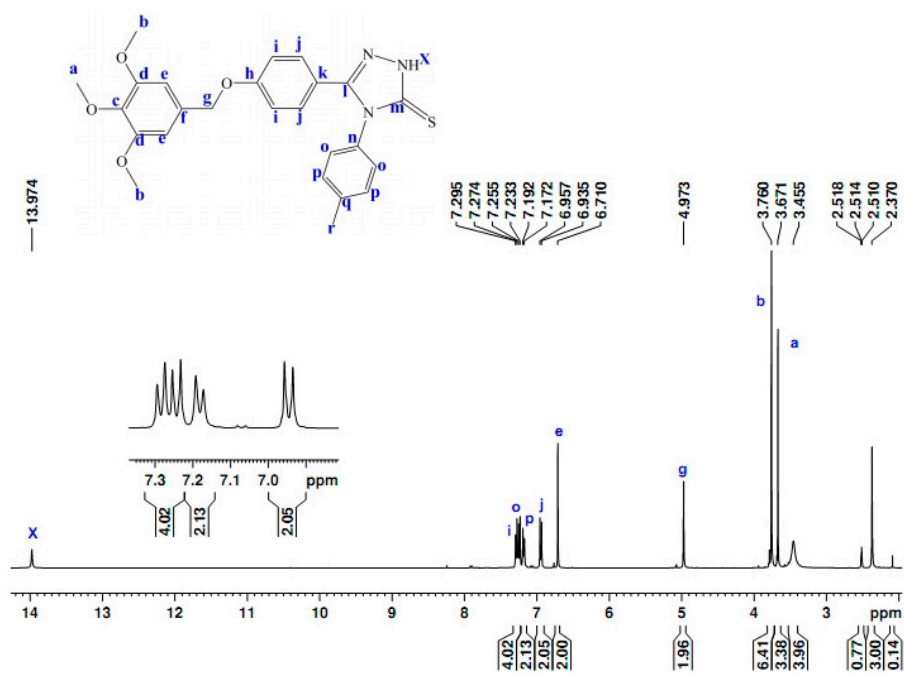Figure S19.  $^1\text{H}$  spectrum (DMSO- $d_6$ , 400 MHz) of 4d.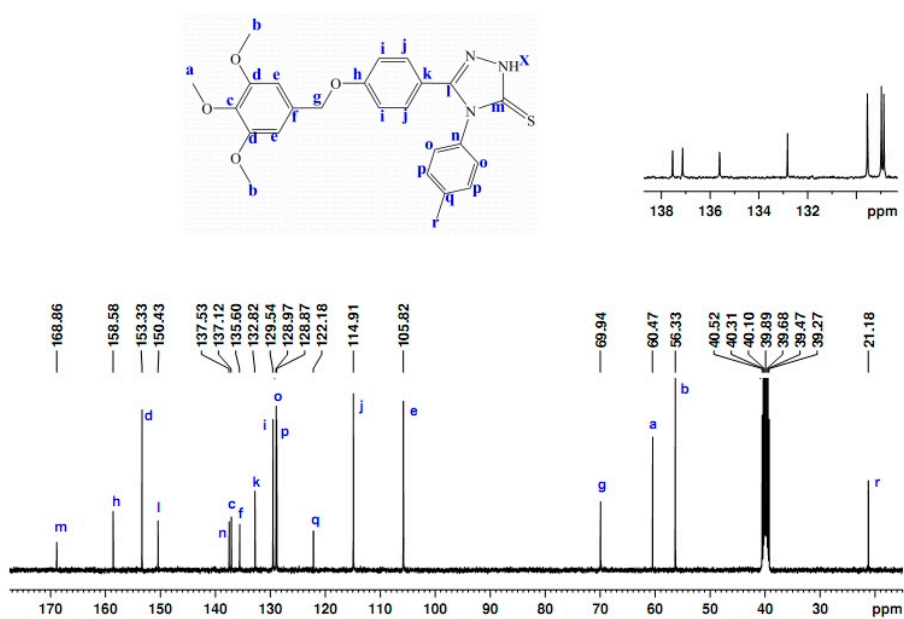Figure S20.  $^{13}\text{C}$  spectrum (DMSO- $d_6$ , 100 MHz) of 4d.

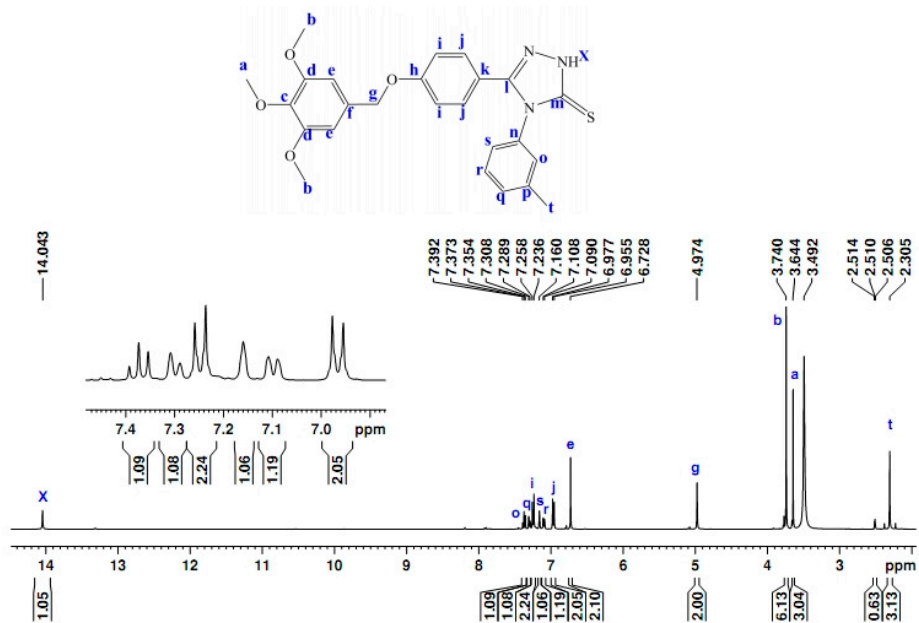Figure S21.  $^1\text{H}$  spectrum ( $\text{DMSO-}d_6$ , 400 MHz) of **4e**.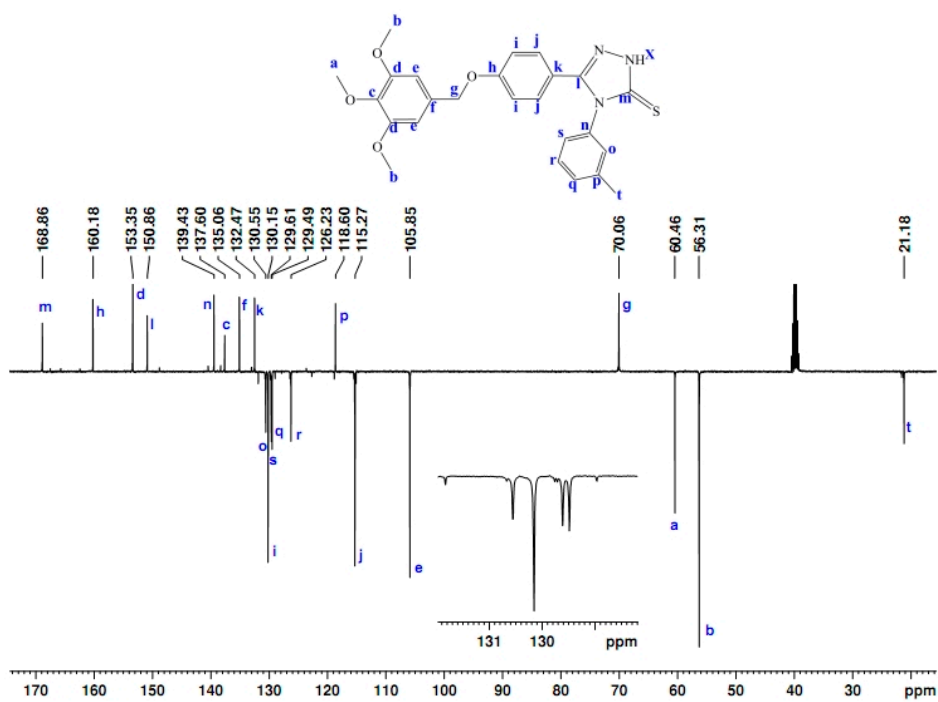Figure S22.  $^{13}\text{C}$  spectrum ( $\text{DMSO-}d_6$ , 100 MHz) of **4e**.

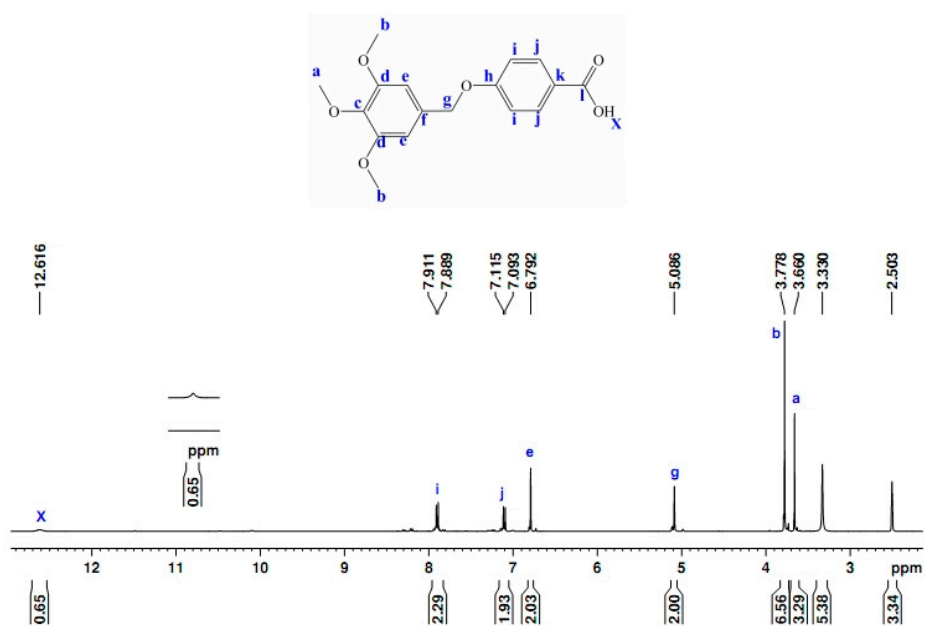Figure S23. <sup>1</sup>H spectrum (DMSO-*d*<sub>6</sub>, 400 MHz) of 4f.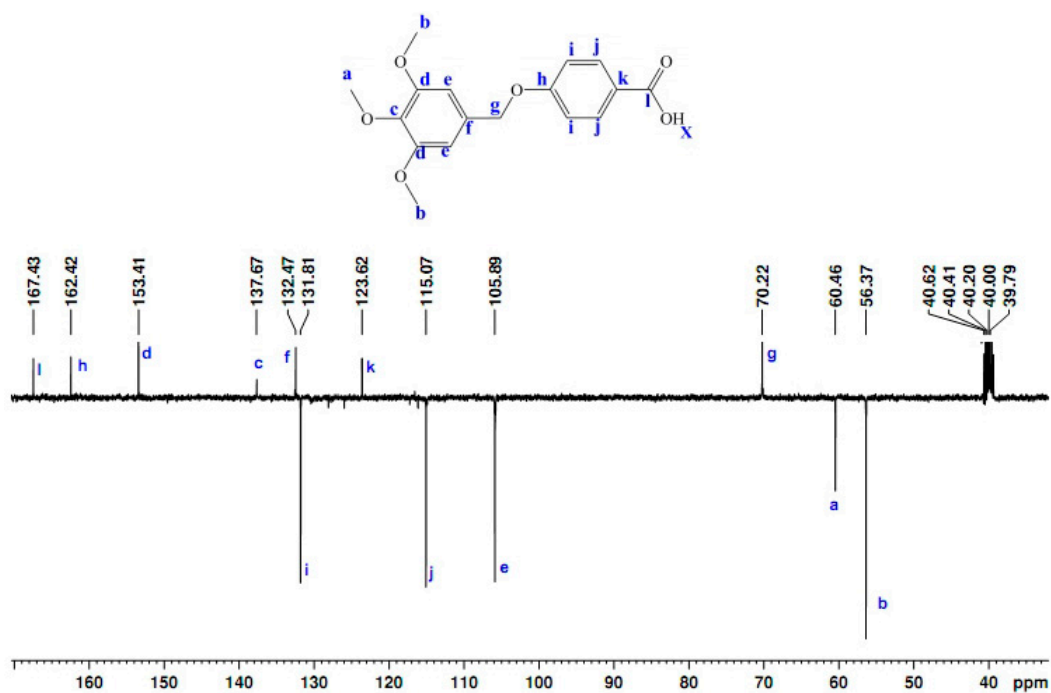Figure S24. <sup>13</sup>C spectrum (DMSO-*d*<sub>6</sub>, 100 MHz) of 4f.

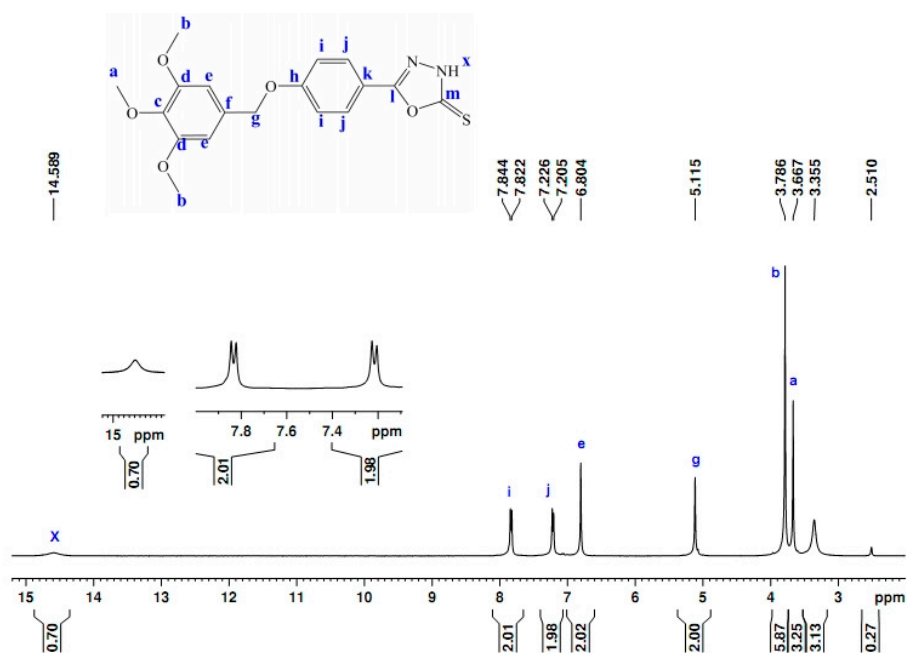Figure S25.  $^1\text{H}$  spectrum (DMSO- $d_6$ , 400 MHz) of 5.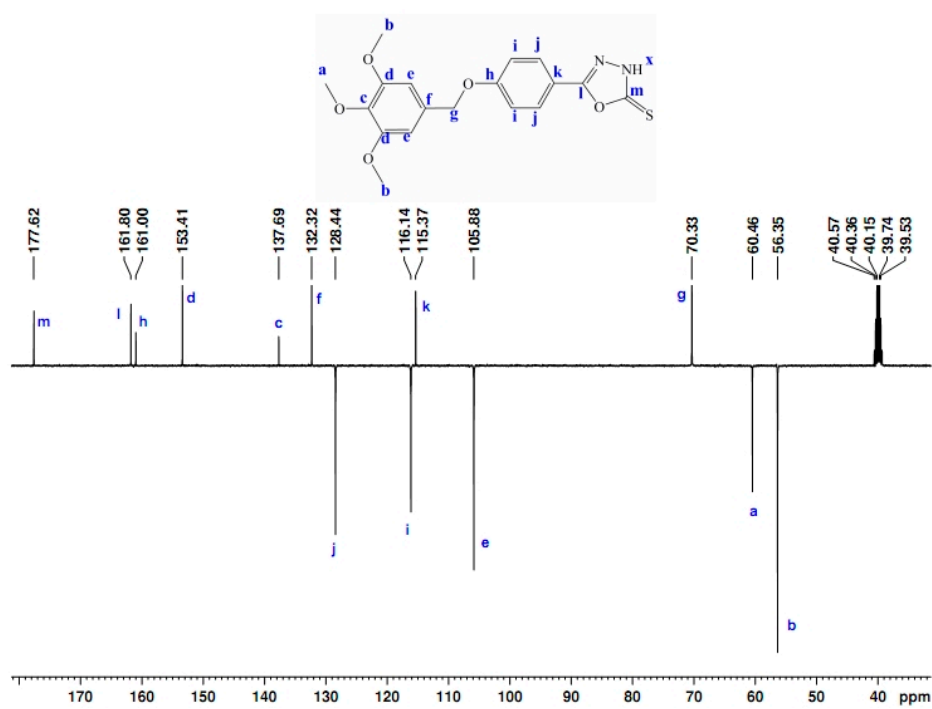Figure S26.  $^{13}\text{C}$  spectrum (DMSO- $d_6$ , 100 MHz) of 5.

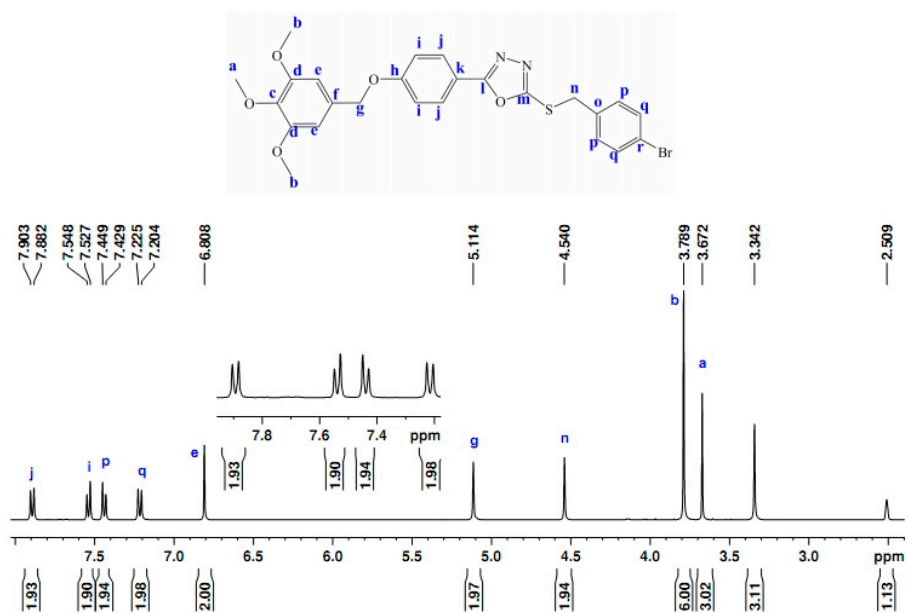Figure S27.  $^1\text{H}$  spectrum (DMSO- $d_6$ , 400 MHz) of 6a.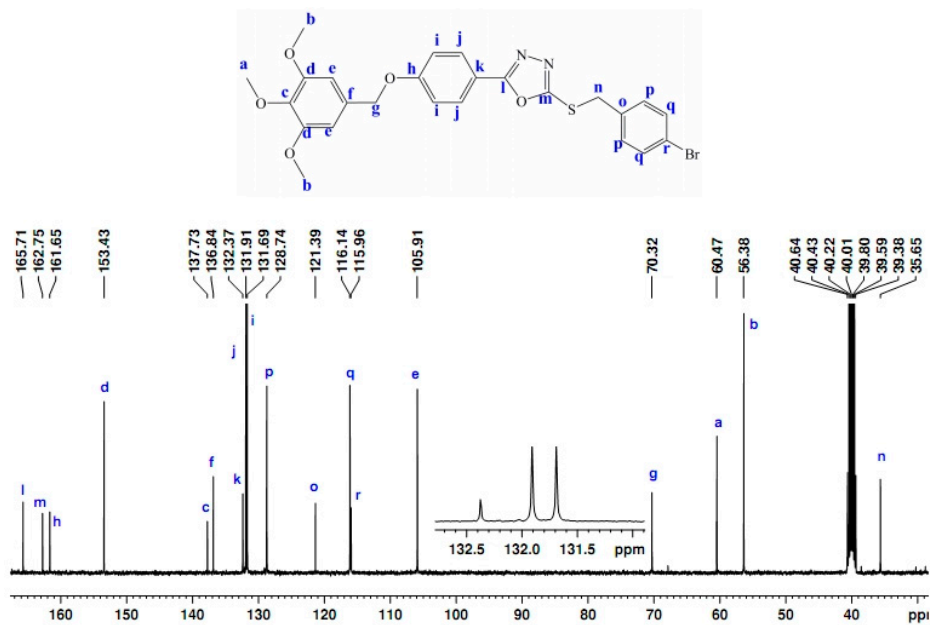Figure S28.  $^{13}\text{C}$  spectrum (DMSO- $d_6$ , 100 MHz) of 6a.

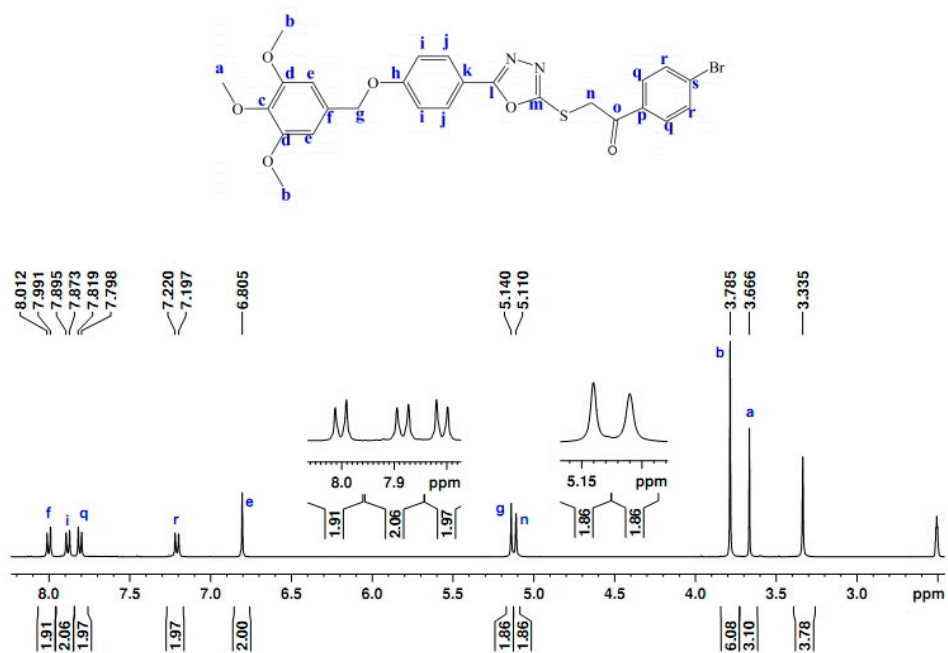Figure S29.  $^1\text{H}$  spectrum (DMSO- $d_6$ , 400 MHz) of 6b.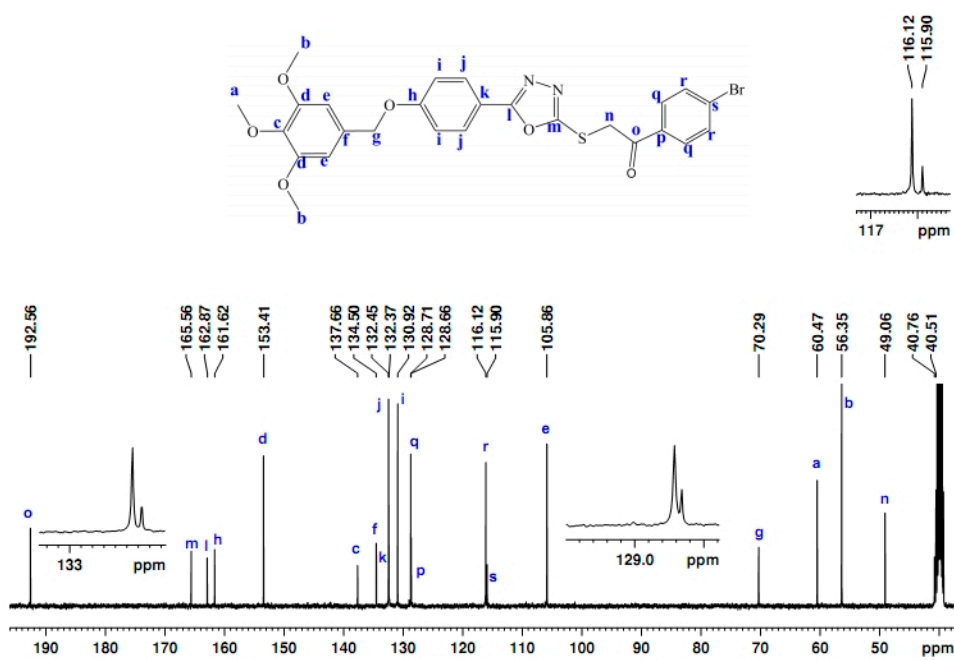Figure S30.  $^{13}\text{C}$  spectrum (DMSO- $d_6$ , 100 MHz) of 6b.

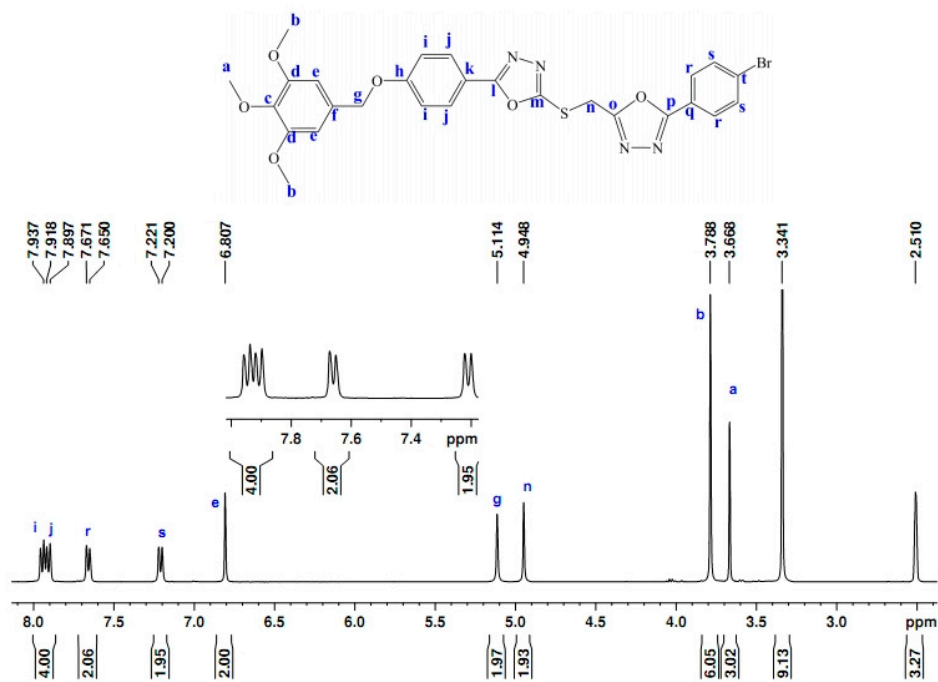Figure S31.  $^1\text{H}$  spectrum (DMSO- $d_6$ , 400 MHz) of 6c.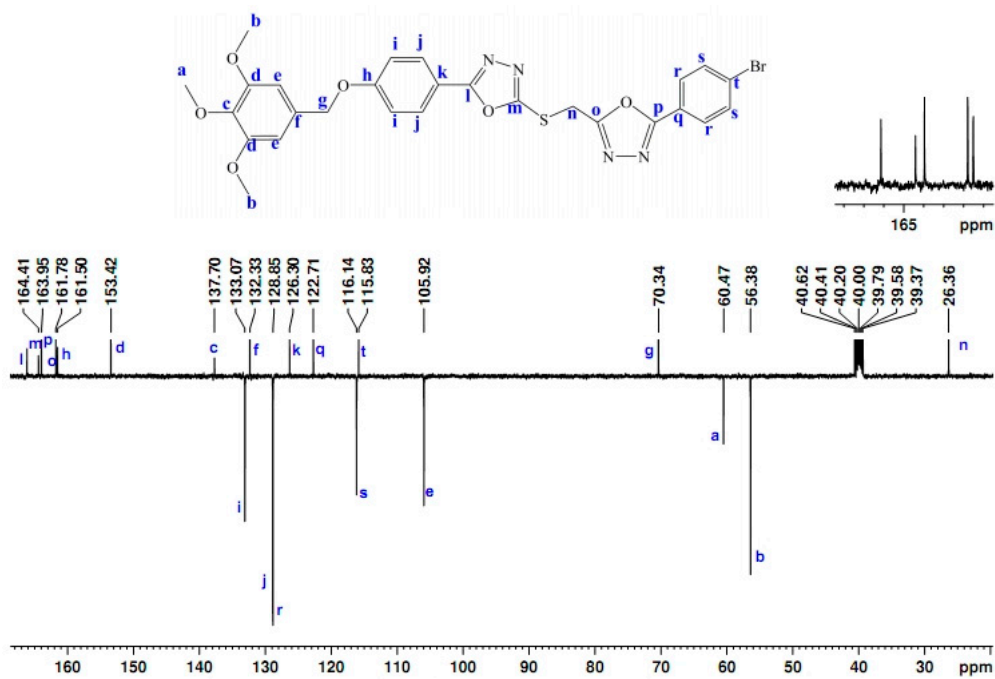Figure S32.  $^{13}\text{C}$  spectrum (DMSO- $d_6$ , 100 MHz) of 6c.



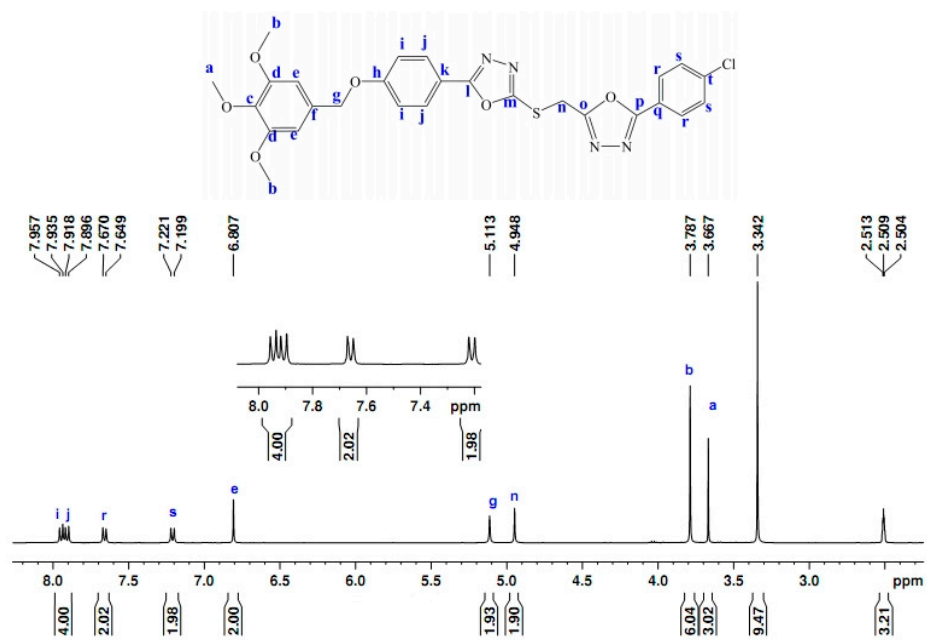Figure S33. <sup>1</sup>H spectrum (DMSO-*d*<sub>6</sub>, 400 MHz) of 6d.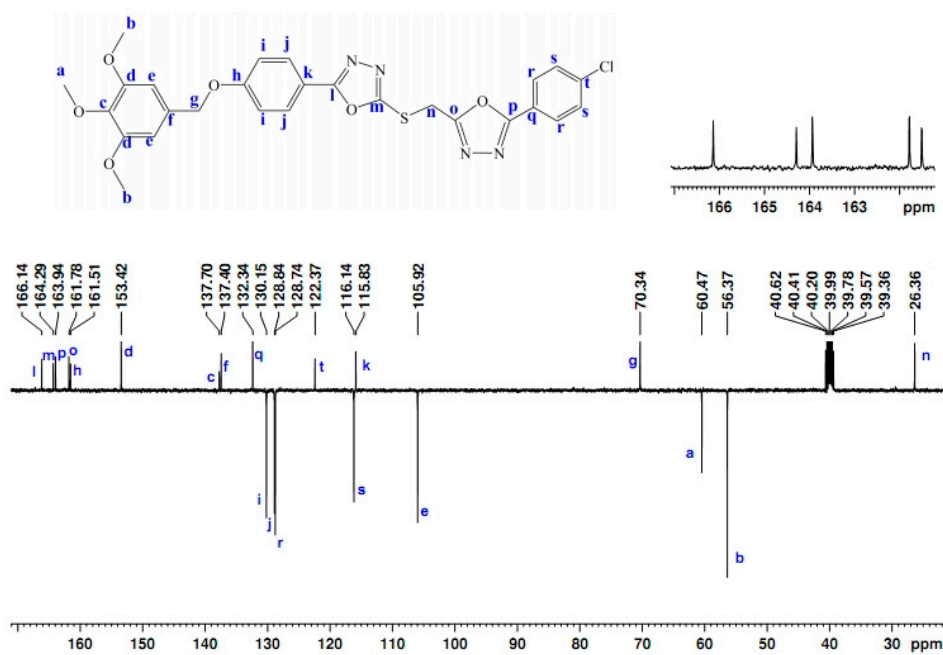Figure S34. <sup>13</sup>C spectrum (DMSO-*d*<sub>6</sub>, 100 MHz) of 6d.

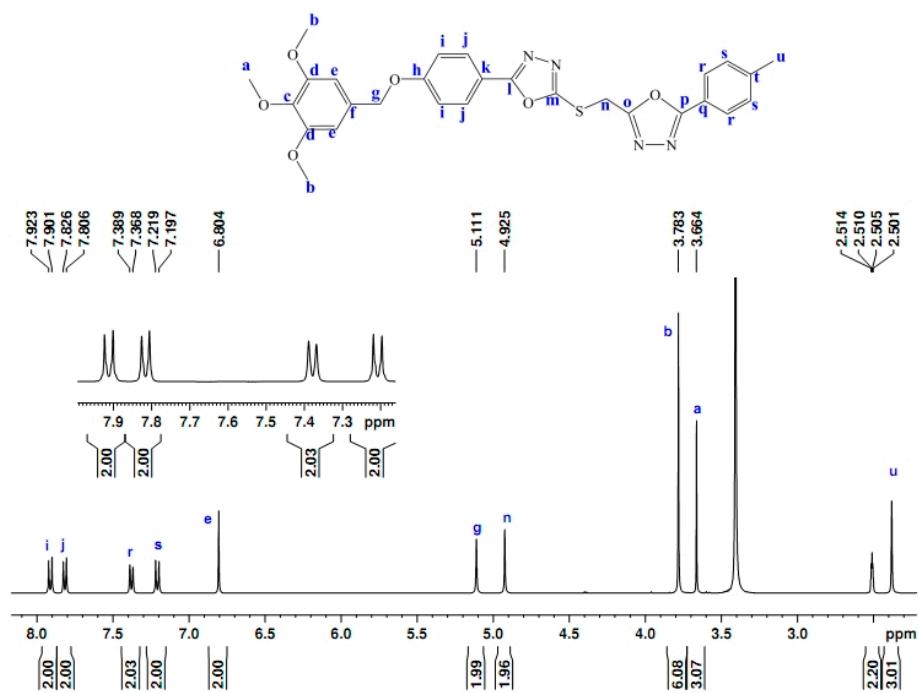Figure S35. <sup>1</sup>H spectrum (DMSO-*d*<sub>6</sub>, 400 MHz) of 6e.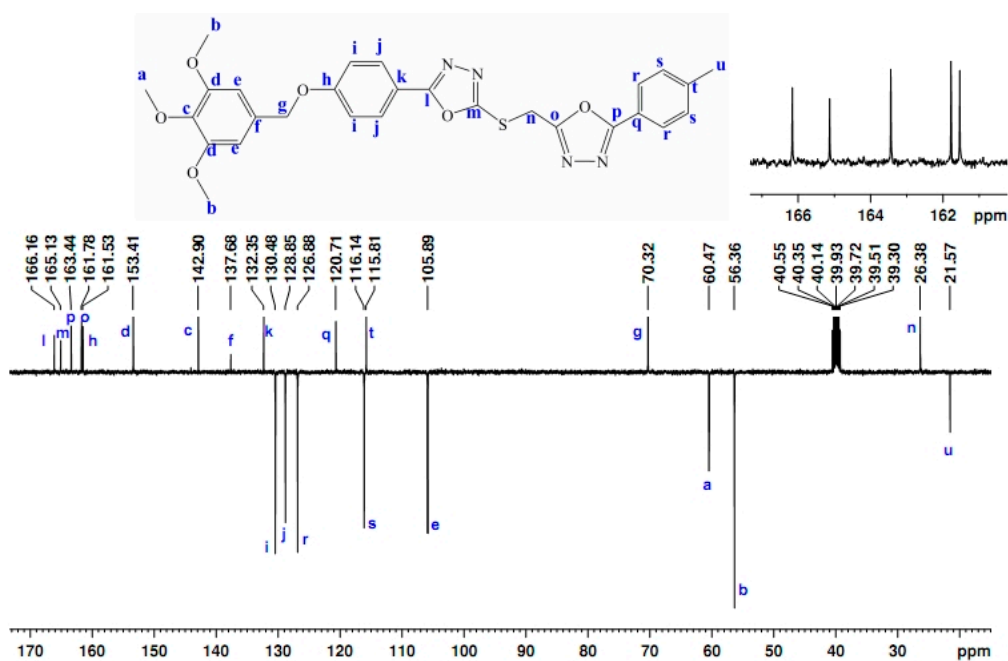Figure S36. <sup>13</sup>C spectrum (DMSO-*d*<sub>6</sub>, 100 MHz) of 6e.

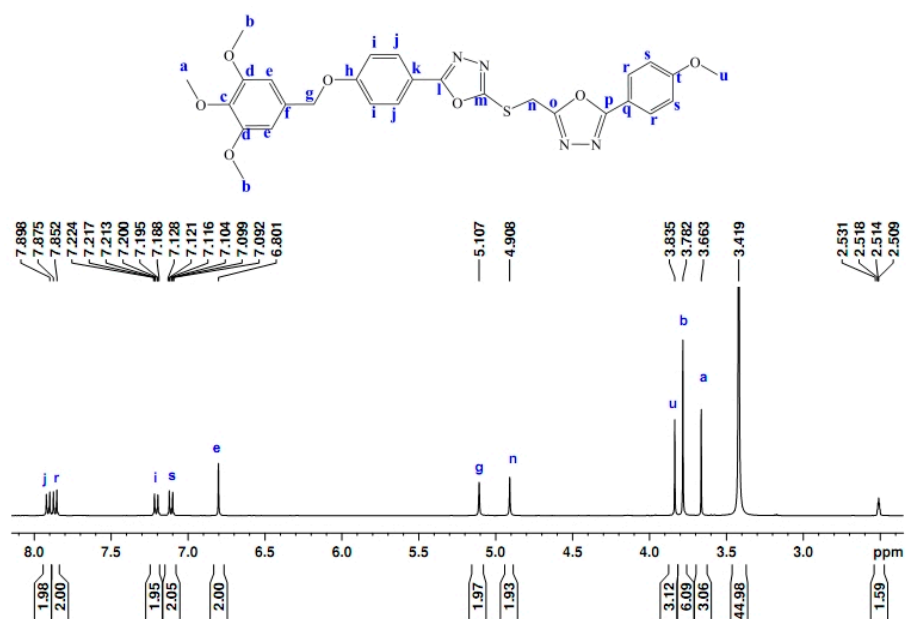Figure S37.  $^1\text{H}$  spectrum (DMSO- $d_6$ , 400 MHz) of 6f.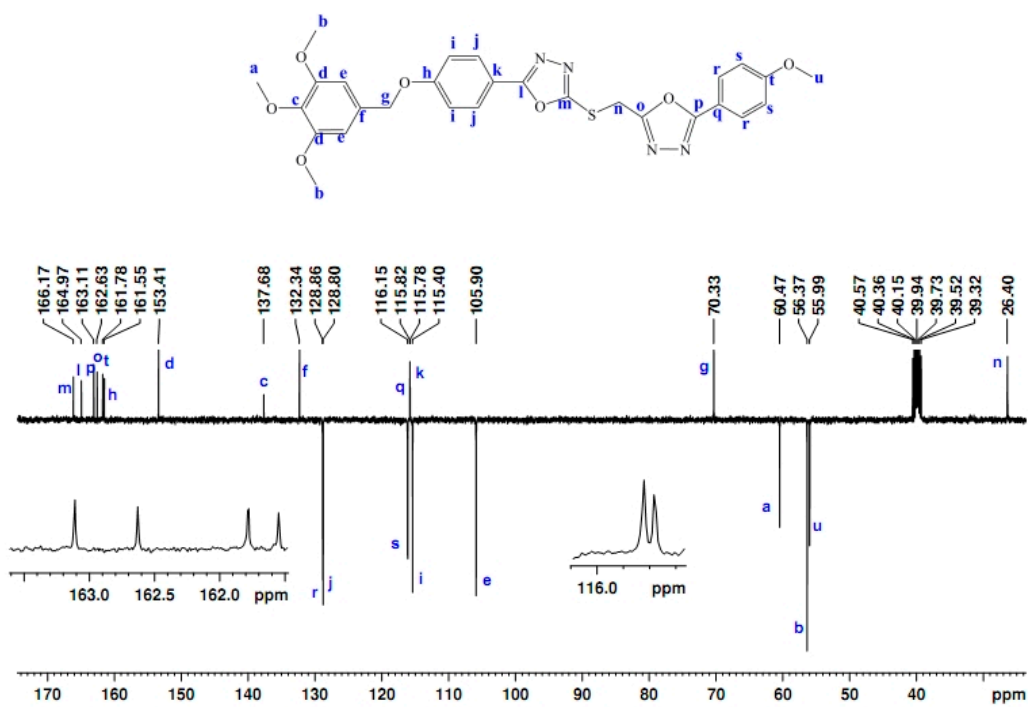Figure S38.  $^{13}\text{C}$  spectrum (DMSO- $d_6$ , 100 MHz) of 6f.

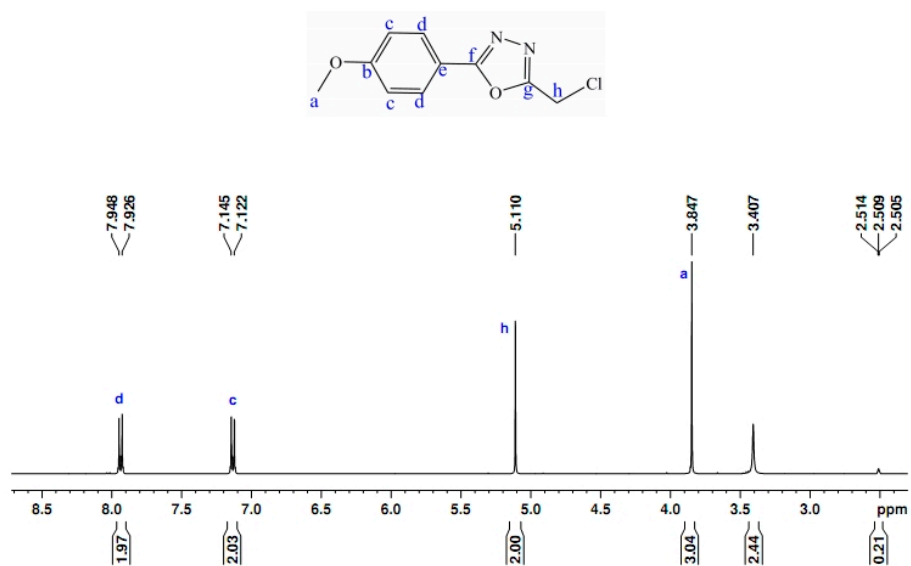Figure S39. <sup>1</sup>H spectrum (DMSO-*d*<sub>6</sub>, 400 MHz) of (R'f).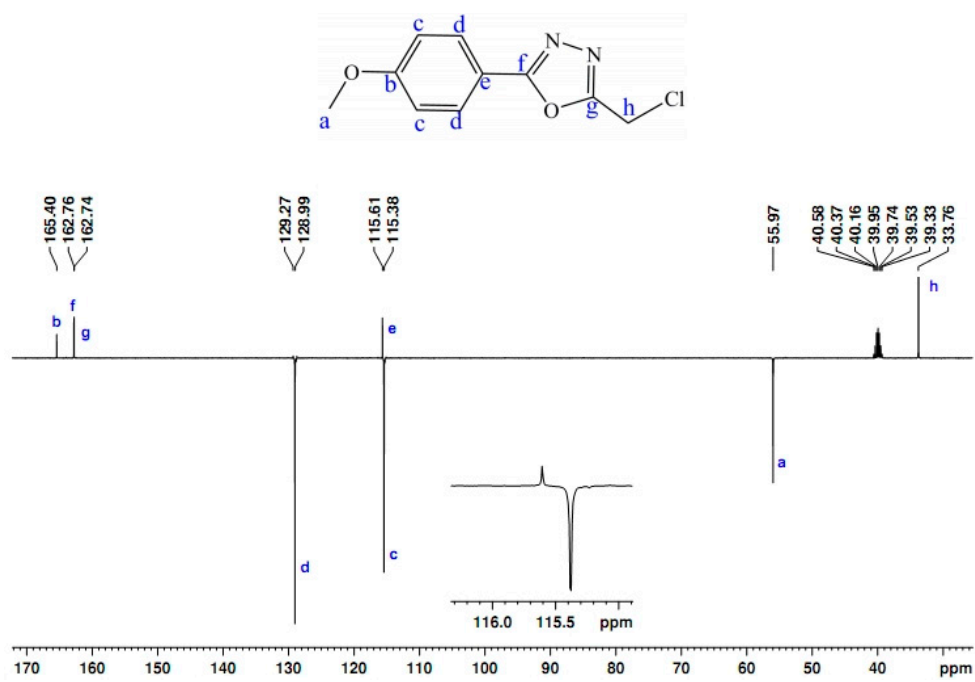Figure S40. <sup>13</sup>C spectrum (DMSO-*d*<sub>6</sub>, 100 MHz) of (R'f).

## Computational Studies at Level of Theory B3LYP/6-311G\*(d,p)

Figure S41. Compound 6a

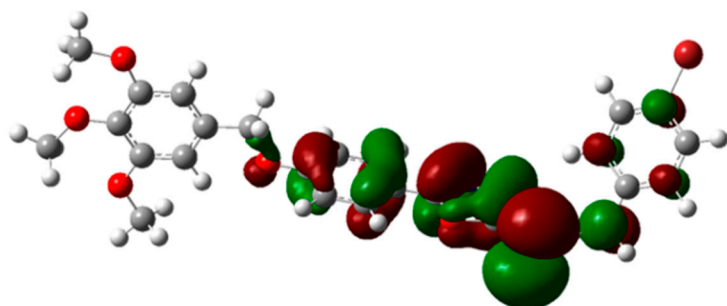**6a**

|                                              |                             |
|----------------------------------------------|-----------------------------|
| Zero-point correction=                       | 0.451221 (Hartree/Particle) |
| Thermal correction to Energy=                | 0.568231                    |
| Thermal correction to Enthalpy=              | 0.569124                    |
| Thermal correction to Gibbs Free Energy=     | 0.562234                    |
| Sum of electronic and zero-point Energies=   | -4135.975609                |
| Sum of electronic and thermal Energies=      | -4135.978015                |
| Sum of electronic and thermal Enthalpies=    | -4135.954114                |
| Sum of electronic and thermal Free Energies= | -4135.976213                |

|       | E (Thermal) | CV             | S              |
|-------|-------------|----------------|----------------|
|       | KCal/Mol    | Cal/Mol-Kelvin | Cal/Mol-Kelvin |
| Total | 298.413     | 118.120        | 225.451        |

**Figure S42. Compound 6a-r1****6a-r1**

|                                              |                             |
|----------------------------------------------|-----------------------------|
| Zero-point correction=                       | 0.435813 (Hartree/Particle) |
| Thermal correction to Energy=                | 0.468444                    |
| Thermal correction to Enthalpy=              | 0.469388                    |
| Thermal correction to Gibbs Free Energy=     | 0.362148                    |
| Sum of electronic and zero-point Energies=   | -4135.421677                |
| Sum of electronic and thermal Energies=      | -4135.389047                |
| Sum of electronic and thermal Enthalpies=    | -4135.388103                |
| Sum of electronic and thermal Free Energies= | -4135.495343                |

|       | E (Thermal)<br>KCal/Mol | CV<br>Cal/Mol-Kelvin | S<br>Cal/Mol-Kelvin |
|-------|-------------------------|----------------------|---------------------|
| Total | 293.953                 | 119.790              | 225.706             |

**Figure S43. Compound 6a-r2****6a-r2**

|                                              |                             |
|----------------------------------------------|-----------------------------|
| Zero-point correction=                       | 0.435309 (Hartree/Particle) |
| Thermal correction to Energy=                | 0.467942                    |
| Thermal correction to Enthalpy=              | 0.468887                    |
| Thermal correction to Gibbs Free Energy=     | 0.363327                    |
| Sum of electronic and zero-point Energies=   | -4135.420798                |
| Sum of electronic and thermal Energies=      | -4135.388164                |
| Sum of electronic and thermal Enthalpies=    | -4135.387220                |
| Sum of electronic and thermal Free Energies= | -4135.492779                |

|       | E (Thermal)<br>KCal/Mol | CV<br>Cal/Mol-Kelvin | S<br>Cal/Mol-Kelvin |
|-------|-------------------------|----------------------|---------------------|
| Total | 293.638                 | 120.466              | 222.169             |

**Figure S44. Compound 6b**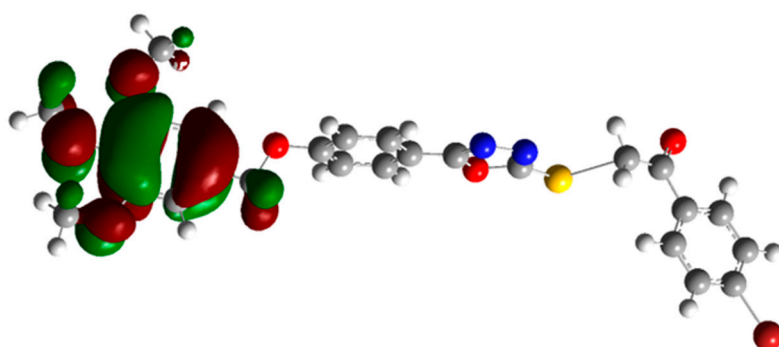**6b**

|                                            |                             |
|--------------------------------------------|-----------------------------|
| Zero-point correction=                     | 0.482112 (Hartree/Particle) |
| Thermal correction to Energy=              | 0.501234                    |
| Thermal correction to Enthalpy=            | 0.503026                    |
| Thermal correction to Gibbs Free Energy=   | 0.403978                    |
| Sum of electronic and zero-point Energies= | -4420.897388                |

Sum of electronic and thermal Energies= -4420.876376  
 Sum of electronic and thermal Enthalpies= -4420.827331  
 Sum of electronic and thermal Free Energies= -4420.873271

|       | E (Thermal)<br>KCal/Mol | CV<br>Cal/Mol-Kelvin | S<br>Cal/Mol-Kelvin |
|-------|-------------------------|----------------------|---------------------|
| Total | 289.137                 | 119.411              | 224.432             |

Figure S45. Compound 6b-r1

**6b-r1**

Zero-point correction= 0.426512 (Hartree/Particle)  
 Thermal correction to Energy= 0.459224  
 Thermal correction to Enthalpy= 0.460168  
 Thermal correction to Gibbs Free Energy= 0.353528  
 Sum of electronic and zero-point Energies= -4420.282688  
 Sum of electronic and thermal Energies= -4420.249976  
 Sum of electronic and thermal Enthalpies= -4420.249031  
 Sum of electronic and thermal Free Energies= -4420.355671

|       | E (Thermal)<br>KCal/Mol | CV<br>Cal/Mol-Kelvin | S<br>Cal/Mol-Kelvin |
|-------|-------------------------|----------------------|---------------------|
| Total | 288.167                 | 119.456              | 224.443             |

Figure S46. Compound 6b-r2

**6b-r2**

Zero-point correction= 0.426439 (Hartree/Particle)  
 Thermal correction to Energy= 0.459121  
 Thermal correction to Enthalpy= 0.460065  
 Thermal correction to Gibbs Free Energy= 0.353179  
 Sum of electronic and zero-point Energies= -4420.291536  
 Sum of electronic and thermal Energies= -4420.258855  
 Sum of electronic and thermal Enthalpies= -4420.257910  
 Sum of electronic and thermal Free Energies= -4420.364797

|       | E (Thermal)<br>KCal/Mol | CV<br>Cal/Mol-Kelvin | S<br>Cal/Mol-Kelvin |
|-------|-------------------------|----------------------|---------------------|
| Total | 288.103                 | 119.679              | 224.961             |

Figure S47. Compound 6e

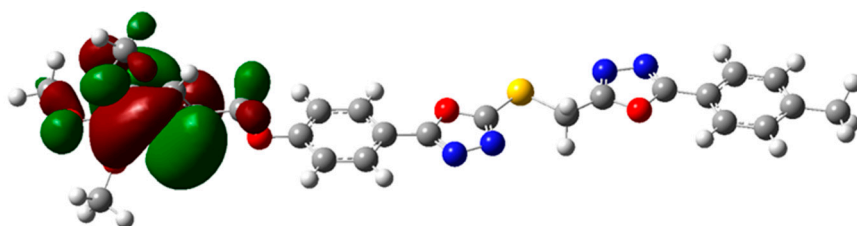**6e**

Zero-point correction= 0.502455 (Hartree/Particle)

|                                              |              |
|----------------------------------------------|--------------|
| Thermal correction to Energy=                | 0.539401     |
| Thermal correction to Enthalpy=              | 0.540345     |
| Thermal correction to Gibbs Free Energy=     | 0.422612     |
| Sum of electronic and zero-point Energies=   | -2150.614196 |
| Sum of electronic and thermal Energies=      | -2150.577251 |
| Sum of electronic and thermal Enthalpies=    | -2150.576306 |
| Sum of electronic and thermal Free Energies= | -2150.694039 |

|       | E (Thermal)<br>KCal/Mol | CV<br>Cal/Mol-Kelvin | S<br>Cal/Mol-Kelvin |
|-------|-------------------------|----------------------|---------------------|
| Total | 338.479                 | 134.573              | 247.789             |

Figure S48. Compound 6e-r1

**6e-r1**

|                                              |                             |
|----------------------------------------------|-----------------------------|
| Zero-point correction=                       | 0.488769 (Hartree/Particle) |
| Thermal correction to Energy=                | 0.525582                    |
| Thermal correction to Enthalpy=              | 0.526526                    |
| Thermal correction to Gibbs Free Energy=     | 0.409200                    |
| Sum of electronic and zero-point Energies=   | -2149.986588                |
| Sum of electronic and thermal Energies=      | -2149.949775                |
| Sum of electronic and thermal Enthalpies=    | -2149.948831                |
| Sum of electronic and thermal Free Energies= | -2150.066157                |

|       | E (Thermal)<br>KCal/Mol | CV<br>Cal/Mol-Kelvin | S<br>Cal/Mol-Kelvin |
|-------|-------------------------|----------------------|---------------------|
| Total | 329.807                 | 134.908              | 246.934             |

Figure S49. Compound 6f

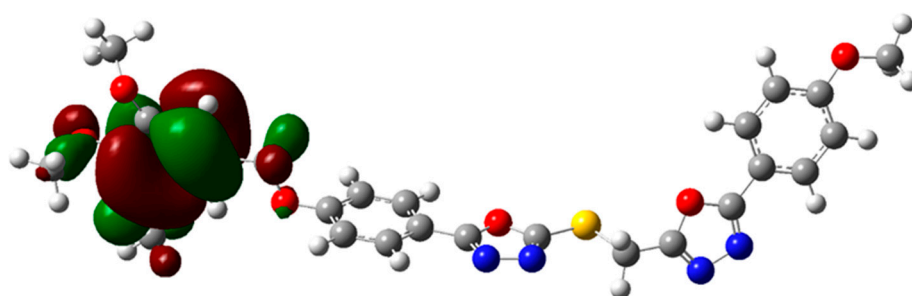**6f**

|                                              |                             |
|----------------------------------------------|-----------------------------|
| Zero-point correction=                       | 0.508304 (Hartree/Particle) |
| Thermal correction to Energy=                | 0.545626                    |
| Thermal correction to Enthalpy=              | 0.546571                    |
| Thermal correction to Gibbs Free Energy=     | 0.429944                    |
| Sum of electronic and zero-point Energies=   | -2225.816610                |
| Sum of electronic and thermal Energies=      | -2225.779288                |
| Sum of electronic and thermal Enthalpies=    | -2225.778343                |
| Sum of electronic and thermal Free Energies= | -2225.894971                |

|       | E (Thermal)<br>KCal/Mol | CV<br>Cal/Mol-Kelvin | S<br>Cal/Mol-Kelvin |
|-------|-------------------------|----------------------|---------------------|
| Total | 342.386                 | 137.567              | 245.462             |



**Figure S50. Compound 6f-r1****6f-r1**

|                                              |                             |
|----------------------------------------------|-----------------------------|
| Zero-point correction=                       | 0.454447 (Hartree/Particle) |
| Thermal correction to Energy=                | 0.531747                    |
| Thermal correction to Enthalpy=              | 0.532692                    |
| Thermal correction to Gibbs Free Energy=     | 0.415957                    |
| Sum of electronic and zero-point Energies=   | -2225.188388                |
| Sum of electronic and thermal Energies=      | -2225.151088                |
| Sum of electronic and thermal Enthalpies=    | -2225.150144                |
| Sum of electronic and thermal Free Energies= | -2225.266879                |

|       | E (Thermal)<br>KCal/Mol | CV<br>Cal/Mol-Kelvin | S<br>Cal/Mol-Kelvin |
|-------|-------------------------|----------------------|---------------------|
| Total | 333.677                 | 137.929              | 245.689             |

**Figure S51. Single point energy calculation for compounds 3f, 6a and 6b****3f.out**

-----  
 Title Card Required  
 -----

Charge = 0 Multiplicity = 1

Symbolic Z-Matrix:

|   |          |          |          |
|---|----------|----------|----------|
| C | 7.7444   | -0.50102 | 1.11674  |
| C | 6.54698  | 0.20809  | 1.05124  |
| C | 6.04703  | 0.63169  | -0.18615 |
| C | 6.75079  | 0.35427  | -1.35067 |
| C | 7.95394  | -0.35573 | -1.29519 |
| C | 8.45885  | -0.78832 | -0.06618 |
| H | 5.98834  | 0.42887  | 1.95086  |
| H | 6.38127  | 0.66     | -2.32219 |
| O | 8.58347  | -0.66552 | -2.47215 |
| O | 9.6565   | -1.45215 | -0.01306 |
| O | 8.31071  | -0.96594 | 2.26399  |
| C | 9.55309  | -2.87257 | 0.1592   |
| H | 10.5744  | -3.2522  | 0.1616   |
| H | 9.07213  | -3.11498 | 1.10994  |
| H | 8.9973   | -3.32178 | -0.66962 |
| C | 7.6626   | -0.68805 | 3.49878  |
| H | 6.66505  | -1.13877 | 3.54003  |
| H | 8.29126  | -1.13176 | 4.26866  |
| H | 7.58339  | 0.39028  | 3.67348  |
| C | 9.86521  | -0.05567 | -2.68225 |
| H | 10.5767  | -0.3567  | -1.9119  |
| H | 10.20453 | -0.40251 | -3.65779 |
| H | 9.77193  | 1.03593  | -2.69871 |
| C | 4.74443  | 1.37956  | -0.24263 |
| H | 4.70832  | 2.1596   | 0.52627  |
| H | 4.61071  | 1.84742  | -1.22277 |
| O | 3.67343  | 0.44209  | -0.00732 |
| C | 2.39892  | 0.89205  | 0.02221  |

|   |           |          |          |
|---|-----------|----------|----------|
| C | 1.41661   | -0.08134 | 0.26469  |
| C | 2.01458   | 2.22783  | -0.16312 |
| C | 0.08099   | 0.27054  | 0.31301  |
| H | 1.73461   | -1.10497 | 0.41711  |
| C | 0.67081   | 2.56957  | -0.10328 |
| H | 2.74843   | 2.99878  | -0.35199 |
| C | -0.31781  | 1.60615  | 0.12327  |
| H | -0.64208  | -0.50739 | 0.52994  |
| H | 0.36282   | 3.59937  | -0.23453 |
| C | -1.72248  | 2.08134  | 0.17843  |
| O | -2.05115  | 3.23971  | 0.28627  |
| N | -2.69647  | 1.05479  | 0.0675   |
| H | -2.44956  | 0.08586  | -0.16674 |
| N | -3.97303  | 1.324    | 0.16775  |
| C | -4.81852  | 0.25074  | -0.02432 |
| N | -6.10214  | 0.71655  | 0.12098  |
| H | -6.10337  | 1.70865  | 0.33161  |
| S | -4.31922  | -1.31867 | -0.36867 |
| C | -7.36069  | 0.12806  | 0.04103  |
| C | -8.45809  | 0.98014  | 0.28704  |
| C | -7.59654  | -1.22328 | -0.26447 |
| C | -9.75273  | 0.50315  | 0.23224  |
| H | -8.28205  | 2.02417  | 0.52308  |
| C | -8.89888  | -1.69928 | -0.31896 |
| H | -6.76798  | -1.88518 | -0.45625 |
| C | -9.96284  | -0.84036 | -0.07167 |
| H | -10.60075 | 1.14646  | 0.41936  |
| H | -9.09961  | -2.73547 | -0.55293 |
| N | -11.33983 | -1.35586 | -0.13109 |
| O | -12.25056 | -0.56658 | 0.0906   |
| O | -11.49264 | -2.54119 | -0.39804 |
| H | -4.31197  | 2.24295  | 0.36938  |

Stoichiometry C<sub>24</sub>H<sub>24</sub>N<sub>4</sub>O<sub>7</sub>S

Framework group C1[X(C<sub>24</sub>H<sub>24</sub>N<sub>4</sub>O<sub>7</sub>S)]

Deg. of freedom 174

Full point group C1 NOp 1

Largest Abelian subgroup C1 NOp 1

Largest concise Abelian subgroup C1 NOp 1

Standard orientation:

| Center<br>Number | Atomic<br>Number | Atomic<br>Type | Coordinates (Angstroms) |           |           |
|------------------|------------------|----------------|-------------------------|-----------|-----------|
|                  |                  |                | X                       | Y         | Z         |
| 1                | 6                | 0              | 7.760733                | -0.499470 | 1.118178  |
| 2                | 6                | 0              | 6.562794                | 0.208513  | 1.049858  |
| 3                | 6                | 0              | 6.062686                | 0.627064  | -0.189183 |
| 4                | 6                | 0              | 6.766786                | 0.345753  | -1.352557 |
| 5                | 6                | 0              | 7.970448                | -0.363147 | -1.294259 |
| 6                | 6                | 0              | 8.475529                | -0.790718 | -0.063558 |
| 7                | 1                | 0              | 6.003885                | 0.432276  | 1.948572  |
| 8                | 1                | 0              | 6.397154                | 0.647537  | -2.325267 |
| 9                | 8                | 0              | 8.600348                | -0.676922 | -2.469960 |

|    |    |   |            |           |           |
|----|----|---|------------|-----------|-----------|
| 10 | 8  | 0 | 9.673664   | -1.453455 | -0.007795 |
| 11 | 8  | 0 | 8.327239   | -0.959633 | 2.267252  |
| 12 | 6  | 0 | 9.571273   | -2.873288 | 0.169829  |
| 13 | 1  | 0 | 10.592864  | -3.252161 | 0.173782  |
| 14 | 1  | 0 | 9.090383   | -3.112457 | 1.121419  |
| 15 | 1  | 0 | 9.015907   | -3.326041 | -0.657349 |
| 16 | 6  | 0 | 7.678782   | -0.677547 | 3.500897  |
| 17 | 1  | 0 | 6.681562   | -1.128840 | 3.543735  |
| 18 | 1  | 0 | 8.307680   | -1.117881 | 4.272524  |
| 19 | 1  | 0 | 7.598763   | 0.401378  | 3.671516  |
| 20 | 6  | 0 | 9.881662   | -0.066928 | -2.682218 |
| 21 | 1  | 0 | 10.593284  | -0.364522 | -1.910654 |
| 22 | 1  | 0 | 10.221351  | -0.417202 | -3.656398 |
| 23 | 1  | 0 | 9.787581   | 1.024533  | -2.702814 |
| 24 | 6  | 0 | 4.759541   | 1.373758  | -0.248642 |
| 25 | 1  | 0 | 4.722768   | 2.156671  | 0.517299  |
| 26 | 1  | 0 | 4.625592   | 1.837811  | -1.230552 |
| 27 | 8  | 0 | 3.689201   | 0.436397  | -0.009914 |
| 28 | 6  | 0 | 2.414358   | 0.885523  | 0.017772  |
| 29 | 6  | 0 | 1.432734   | -0.087660 | 0.263810  |
| 30 | 6  | 0 | 2.029055   | 2.220315  | -0.172652 |
| 31 | 6  | 0 | 0.096854   | 0.263413  | 0.310651  |
| 32 | 1  | 0 | 1.751471   | -1.110474 | 0.420137  |
| 33 | 6  | 0 | 0.685034   | 2.561287  | -0.114259 |
| 34 | 1  | 0 | 2.762369   | 2.991080  | -0.364355 |
| 35 | 6  | 0 | -0.302912  | 1.598003  | 0.115809  |
| 36 | 1  | 0 | -0.625674  | -0.514218 | 0.530431  |
| 37 | 1  | 0 | 0.376299   | 3.590355  | -0.249441 |
| 38 | 6  | 0 | -1.707933  | 2.072369  | 0.169015  |
| 39 | 8  | 0 | -2.037470  | 3.230901  | 0.272437  |
| 40 | 7  | 0 | -2.681153  | 1.044692  | 0.061852  |
| 41 | 1  | 0 | -2.433503  | 0.075071  | -0.168688 |
| 42 | 7  | 0 | -3.957923  | 1.313347  | 0.160936  |
| 43 | 6  | 0 | -4.802602  | 0.238747  | -0.027172 |
| 44 | 7  | 0 | -6.086579  | 0.704157  | 0.116218  |
| 45 | 1  | 0 | -6.088569  | 1.697044  | 0.323092  |
| 46 | 16 | 0 | -4.302114  | -1.331591 | -0.365526 |
| 47 | 6  | 0 | -7.344691  | 0.114440  | 0.038341  |
| 48 | 6  | 0 | -8.442747  | 0.966645  | 0.281002  |
| 49 | 6  | 0 | -7.579514  | -1.238210 | -0.262068 |
| 50 | 6  | 0 | -9.737033  | 0.488494  | 0.227860  |
| 51 | 1  | 0 | -8.267495  | 2.011687  | 0.513111  |
| 52 | 6  | 0 | -8.881496  | -1.715367 | -0.314911 |
| 53 | 1  | 0 | -6.750439  | -1.900224 | -0.451247 |
| 54 | 6  | 0 | -9.946115  | -0.856308 | -0.070991 |
| 55 | 1  | 0 | -10.585548 | 1.131887  | 0.412448  |
| 56 | 1  | 0 | -9.081441  | -2.752582 | -0.544982 |
| 57 | 7  | 0 | -11.322717 | -1.373040 | -0.128622 |
| 58 | 8  | 0 | -12.234055 | -0.583592 | 0.089970  |
| 59 | 8  | 0 | -11.474626 | -2.559477 | -0.391110 |
| 60 | 1  | 0 | -4.297568  | 2.232798  | 0.359052  |

---

Rotational constants (GHZ): 0.3166523 0.0189429 0.0186441  
 Standard basis: 6-311++G(d,p) (5D, 7F)  
 There are 968 symmetry adapted basis functions of A symmetry.  
 Integral buffers will be 131072 words long.  
 Raffinetti 2 integral format.  
 Two-electron integral symmetry is turned on.  
 968 basis functions, 1526 primitive gaussians, 1004 cartesian basis functions  
 134 alpha electrons 134 beta electrons  
 nuclear repulsion energy 3474.9084117772 Hartrees.  
 NAtoms= 60 NActive= 60 NUniq= 60 SFac= 1.00D+00 NAtFMM= 60 NAOKFM=T Big=T

-----  
 Polarizable Continuum Model (PCM)  
 =====

Model : PCM.  
 Atomic radii : UFF (Universal Force Field).  
 Polarization charges : Total charges.  
 Charge compensation : None.  
 Solution method : Matrix inversion.  
 Cavity type : Scaled VdW (van der Waals Surface) (Alpha=1.100).  
 Cavity algorithm : GePol (No added spheres)  
 Default sphere list used, NSphG= 60.  
 Lebedev-Laikov grids with approx. 5.0 points / Ang\*\*2.  
 Smoothing algorithm: Karplus/York (Gamma=1.0000).  
 Polarization charges: spherical gaussians, with  
 point-specific exponents (IZeta= 3).  
 Self-potential: point-specific (ISelfS= 7).  
 Self-field : sphere-specific E.n sum rule (ISelfD= 2).  
 Solvent : DiMethylSulfoxide, Eps= 46.826000 Eps(inf)= 2.007889

-----  
**3f-r1.out**

-----  
 Title Card Required  
 -----

Charge = 0 Multiplicity = 2

Symbolic Z-Matrix:

|   |          |          |          |
|---|----------|----------|----------|
| C | -3.32402 | 0.08398  | 0.81162  |
| C | -1.92546 | 0.04121  | 0.73479  |
| C | -1.2326  | 1.02669  | 0.01881  |
| C | -1.93824 | 2.05547  | -0.61969 |
| C | -3.33687 | 2.09842  | -0.54264 |
| C | -4.0298  | 1.11235  | 0.17268  |
| H | -1.38664 | -0.74396 | 1.22271  |
| H | -1.40911 | 2.80815  | -1.16602 |
| O | -4.05677 | 3.14846  | -1.19392 |
| O | -5.45699 | 1.1553   | 0.25081  |
| O | -4.03107 | -0.92174 | 1.54208  |
| C | -5.88421 | 0.57436  | 1.4857   |
| H | -6.9521  | 0.60646  | 1.54439  |
| H | -5.55472 | -0.44251 | 1.53432  |
| H | -5.46543 | 1.12439  | 2.30242  |
| C | -3.29636 | -2.1478  | 1.49881  |

|   |          |          |          |
|---|----------|----------|----------|
| H | -2.33134 | -2.00103 | 1.93713  |
| H | -3.82565 | -2.90017 | 2.04532  |
| H | -3.18236 | -2.45962 | 0.48161  |
| C | -4.38068 | 2.74826  | -2.52804 |
| H | -4.98588 | 1.86636  | -2.49891 |
| H | -4.91886 | 3.53421  | -3.01546 |
| H | -3.47962 | 2.54481  | -3.06803 |
| C | 0.30423  | 0.97898  | -0.06631 |
| H | 0.69651  | 0.52443  | 0.81936  |
| H | 0.59642  | 0.40543  | -0.92103 |
| O | 0.81676  | 2.30846  | -0.18687 |
| C | 2.24374  | 2.263    | -0.26692 |
| C | 3.01362  | 2.32531  | 0.90238  |
| C | 2.87228  | 2.15599  | -1.51487 |
| C | 4.41213  | 2.28055  | 0.82373  |
| H | 2.53369  | 2.40704  | 1.85516  |
| C | 4.27071  | 2.11088  | -1.59351 |
| H | 2.28438  | 2.10866  | -2.40768 |
| C | 5.04065  | 2.17327  | -0.42424 |
| H | 4.99993  | 2.32822  | 1.71645  |
| H | 4.75057  | 2.02887  | -2.54631 |
| C | 6.57742  | 2.12398  | -0.51106 |
| O | 7.1412   | 2.0255   | -1.63176 |
| N | 7.38602  | 2.19206  | 0.71471  |
| H | 7.5956   | 3.14743  | 0.92291  |
| N | 8.57838  | 1.48288  | 0.52682  |
| C | 9.38963  | 1.55437  | 1.75067  |
| N | 9.23557  | 0.53295  | 2.7966   |
| S | 10.41909 | 2.71969  | 1.94019  |
| C | 8.25993  | 0.72952  | 3.87846  |
| C | 6.94554  | 0.26669  | 3.72993  |
| C | 8.64458  | 1.3799   | 5.05871  |
| C | 6.01588  | 0.45425  | 4.76178  |
| H | 6.65181  | -0.22989 | 2.82881  |
| C | 7.71493  | 1.56757  | 6.09036  |
| H | 9.64816  | 1.73323  | 5.17211  |
| C | 6.40061  | 1.10468  | 5.94196  |
| H | 5.01231  | 0.10079  | 4.64855  |
| H | 8.0086   | 2.06434  | 6.9914   |
| N | 5.42552  | 1.30151  | 7.02429  |
| O | 4.26475  | 0.89271  | 6.89341  |
| O | 5.76531  | 1.87604  | 8.06648  |
| H | 8.36869  | 0.527    | 0.3211   |

Stoichiometry C<sub>24</sub>H<sub>23</sub>N<sub>4</sub>O<sub>7</sub>S(2)

Framework group C1[X(C<sub>24</sub>H<sub>23</sub>N<sub>4</sub>O<sub>7</sub>S)]

Deg. of freedom 171

Full point group C1 NOp 1

Largest Abelian subgroup C1 NOp 1

Largest concise Abelian subgroup C1 NOp 1

Standard orientation:

-----  
 Center Atomic Atomic Coordinates (Angstroms)

| Number | Number | Type | X         | Y         | Z         |
|--------|--------|------|-----------|-----------|-----------|
| 1      | 6      | 0    | -6.170152 | 1.153904  | 0.733948  |
| 2      | 6      | 0    | -4.847448 | 0.747465  | 0.955179  |
| 3      | 6      | 0    | -4.323420 | -0.345650 | 0.252082  |
| 4      | 6      | 0    | -5.121850 | -1.031880 | -0.672907 |
| 5      | 6      | 0    | -6.444568 | -0.625268 | -0.894370 |
| 6      | 6      | 0    | -6.968859 | 0.467407  | -0.190555 |
| 7      | 1      | 0    | -4.237656 | 1.271710  | 1.661018  |
| 8      | 1      | 0    | -4.721537 | -1.866272 | -1.210031 |
| 9      | 8      | 0    | -7.259077 | -1.325365 | -1.838529 |
| 10     | 8      | 0    | -8.318762 | 0.882078  | -0.415586 |
| 11     | 8      | 0    | -6.704965 | 2.269246  | 1.451537  |
| 12     | 6      | 0    | -8.427703 | 2.290603  | -0.193855 |
| 13     | 1      | 0    | -9.437705 | 2.601108  | -0.362245 |
| 14     | 1      | 0    | -8.148783 | 2.515556  | 0.814382  |
| 15     | 1      | 0    | -7.778103 | 2.809087  | -0.867748 |
| 16     | 6      | 0    | -6.071361 | 2.361882  | 2.730154  |
| 17     | 1      | 0    | -5.018019 | 2.495299  | 2.597465  |
| 18     | 1      | 0    | -6.471765 | 3.196413  | 3.266926  |
| 19     | 1      | 0    | -6.250208 | 1.463275  | 3.282816  |
| 20     | 6      | 0    | -7.948660 | -2.389205 | -1.176965 |
| 21     | 1      | 0    | -8.567393 | -1.986111 | -0.402647 |
| 22     | 1      | 0    | -8.557671 | -2.913328 | -1.883596 |
| 23     | 1      | 0    | -7.236880 | -3.064228 | -0.749648 |
| 24     | 6      | 0    | -2.870153 | -0.792729 | 0.496039  |
| 25     | 1      | 0    | -2.278039 | 0.054534  | 0.772537  |
| 26     | 1      | 0    | -2.847155 | -1.516396 | 1.283858  |
| 27     | 8      | 0    | -2.342614 | -1.373210 | -0.699576 |
| 28     | 6      | 0    | -0.993562 | -1.788989 | -0.471700 |
| 29     | 6      | 0    | 0.063879  | -0.902660 | -0.716852 |
| 30     | 6      | 0    | -0.729008 | -3.082917 | -0.003042 |
| 31     | 6      | 0    | 1.385951  | -1.310271 | -0.493277 |
| 32     | 1      | 0    | -0.138150 | 0.085233  | -1.074702 |
| 33     | 6      | 0    | 0.592974  | -3.490408 | 0.220862  |
| 34     | 1      | 0    | -1.536456 | -3.759720 | 0.183895  |
| 35     | 6      | 0    | 1.650471  | -2.604146 | -0.024355 |
| 36     | 1      | 0    | 2.193304  | -0.633623 | -0.680540 |
| 37     | 1      | 0    | 0.794922  | -4.478239 | 0.578976  |
| 38     | 6      | 0    | 3.103142  | -3.052404 | 0.221516  |
| 39     | 8      | 0    | 3.339954  | -4.213614 | 0.644601  |
| 40     | 7      | 0    | 4.213270  | -2.124360 | -0.037964 |
| 41     | 1      | 0    | 4.518751  | -2.226773 | -0.984644 |
| 42     | 7      | 0    | 5.274330  | -2.412590 | 0.828647  |
| 43     | 6      | 0    | 6.386663  | -1.487872 | 0.566635  |
| 44     | 7      | 0    | 6.467690  | -0.210386 | 1.289450  |
| 45     | 16     | 0    | 7.486440  | -1.864240 | -0.483370 |
| 46     | 6      | 0    | 5.829157  | 0.991161  | 0.733101  |
| 47     | 6      | 0    | 4.501567  | 1.295966  | 1.062458  |
| 48     | 6      | 0    | 6.548481  | 1.832004  | -0.126831 |
| 49     | 6      | 0    | 3.893405  | 2.441720  | 0.531857  |
| 50     | 1      | 0    | 3.952319  | 0.653991  | 1.719026  |

|    |   |   |          |           |           |
|----|---|---|----------|-----------|-----------|
| 51 | 6 | 0 | 5.940280 | 2.977549  | -0.657499 |
| 52 | 1 | 0 | 7.562137 | 1.599286  | -0.378259 |
| 53 | 6 | 0 | 4.612784 | 3.282473  | -0.328108 |
| 54 | 1 | 0 | 2.879792 | 2.674632  | 0.783365  |
| 55 | 1 | 0 | 6.489468 | 3.619408  | -1.314239 |
| 56 | 7 | 0 | 3.974925 | 4.484248  | -0.884753 |
| 57 | 8 | 0 | 2.802565 | 4.753711  | -0.593899 |
| 58 | 8 | 0 | 4.610251 | 5.226643  | -1.644303 |
| 59 | 1 | 0 | 4.969387 | -2.307701 | 1.775227  |

-----  
 Rotational constants (GHZ): 0.1428738 0.0335642 0.0285526

Standard basis: 6-311++G(d,p) (5D, 7F)

There are 961 symmetry adapted basis functions of A symmetry.

Integral buffers will be 131072 words long.

Raffenetti 2 integral format.

Two-electron integral symmetry is turned on.

961 basis functions, 1517 primitive gaussians, 997 cartesian basis functions

134 alpha electrons 133 beta electrons

nuclear repulsion energy 3616.4865002445 Hartrees.

NAtoms= 59 NActive= 59 NUniq= 59 SFac= 1.00D+00 NAtFMM= 60 NAOKFM=F Big=F

-----  
 Polarizable Continuum Model (PCM)

Model : PCM.

Atomic radii : UFF (Universal Force Field).

Polarization charges : Total charges.

Charge compensation : None.

Solution method : Matrix inversion.

Cavity type : Scaled VdW (van der Waals Surface) (Alpha=1.100).

Cavity algorithm : GePol (No added spheres)

Default sphere list used, NSphG= 59.

Lebedev-Laikov grids with approx. 5.0 points / Ang\*\*2.

Smoothing algorithm: Karplus/York (Gamma=1.0000).

Polarization charges: spherical gaussians, with  
 point-specific exponents (IZeta= 3).

Self-potential: point-specific (ISelfS= 7).

Self-field : sphere-specific E.n sum rule (ISelfD= 2).

Solvent : DiMethylSulfoxide, Eps= 46.826000 Eps(inf)= 2.007889

### 3f-r2.out

-----  
 Title Card Required

-----  
 Charge = 0 Multiplicity = 2

Symbolic Z-Matrix:

|   |          |          |          |
|---|----------|----------|----------|
| C | -7.7444  | 0.50102  | 1.11674  |
| C | -6.54698 | -0.20809 | 1.05124  |
| C | -6.04703 | -0.63169 | -0.18615 |
| C | -6.75079 | -0.35427 | -1.35067 |
| C | -7.95394 | 0.35573  | -1.29519 |
| C | -8.45885 | 0.78832  | -0.06618 |

|   |           |          |          |
|---|-----------|----------|----------|
| H | -5.98834  | -0.42887 | 1.95086  |
| H | -6.38127  | -0.66    | -2.32219 |
| O | -8.58347  | 0.66552  | -2.47215 |
| O | -9.6565   | 1.45215  | -0.01306 |
| O | -8.31071  | 0.96594  | 2.26399  |
| C | -9.55309  | 2.87257  | 0.1592   |
| H | -10.5744  | 3.2522   | 0.1616   |
| H | -9.07213  | 3.11498  | 1.10994  |
| H | -8.9973   | 3.32178  | -0.66962 |
| C | -7.6626   | 0.68805  | 3.49878  |
| H | -6.66505  | 1.13877  | 3.54003  |
| H | -8.29126  | 1.13176  | 4.26866  |
| H | -7.58339  | -0.39028 | 3.67348  |
| C | -9.86521  | 0.05567  | -2.68225 |
| H | -10.5767  | 0.3567   | -1.9119  |
| H | -10.20453 | 0.40251  | -3.65779 |
| H | -9.77193  | -1.03593 | -2.69871 |
| C | -4.74443  | -1.37956 | -0.24263 |
| H | -4.70832  | -2.1596  | 0.52627  |
| H | -4.61071  | -1.84742 | -1.22277 |
| O | -3.67343  | -0.44209 | -0.00732 |
| C | -2.39892  | -0.89205 | 0.02221  |
| C | -1.41661  | 0.08134  | 0.26469  |
| C | -2.01458  | -2.22783 | -0.16312 |
| C | -0.08099  | -0.27054 | 0.31301  |
| H | -1.73461  | 1.10497  | 0.41711  |
| C | -0.67081  | -2.56957 | -0.10328 |
| H | -2.74843  | -2.99878 | -0.35199 |
| C | 0.31781   | -1.60615 | 0.12327  |
| H | 0.64208   | 0.50739  | 0.52994  |
| H | -0.36282  | -3.59937 | -0.23453 |
| C | 1.72248   | -2.08134 | 0.17843  |
| O | 2.05115   | -3.23971 | 0.28627  |
| N | 2.69647   | -1.05479 | 0.0675   |
| H | 2.44956   | -0.08586 | -0.16674 |
| N | 3.97303   | -1.324   | 0.16775  |
| C | 4.81852   | -0.25074 | -0.02432 |
| N | 6.10214   | -0.71655 | 0.12098  |
| H | 6.10337   | -1.70865 | 0.33161  |
| S | 4.31922   | 1.31867  | -0.36867 |
| C | 7.36069   | -0.12806 | 0.04103  |
| C | 8.45809   | -0.98014 | 0.28704  |
| C | 7.59654   | 1.22328  | -0.26447 |
| C | 9.75273   | -0.50315 | 0.23224  |
| H | 8.28205   | -2.02417 | 0.52308  |
| C | 8.89888   | 1.69928  | -0.31896 |
| H | 6.76798   | 1.88518  | -0.45625 |
| C | 9.96284   | 0.84036  | -0.07167 |
| H | 10.60075  | -1.14646 | 0.41936  |
| H | 9.09961   | 2.73547  | -0.55293 |
| N | 11.33983  | 1.35586  | -0.13109 |
| O | 12.25056  | 0.56658  | 0.0906   |



O 11.49264 2.54119 -0.39804

Stoichiometry C<sub>24</sub>H<sub>23</sub>N<sub>4</sub>O<sub>7</sub>S(2)

Framework group C1[X(C<sub>24</sub>H<sub>23</sub>N<sub>4</sub>O<sub>7</sub>S)]

Deg. of freedom 171

Full point group C1 NOp 1

Largest Abelian subgroup C1 NOp 1

Largest concise Abelian subgroup C1 NOp 1

Standard orientation:

| Center<br>Number | Atomic<br>Number | Atomic<br>Type | Coordinates (Angstroms) |           |           |
|------------------|------------------|----------------|-------------------------|-----------|-----------|
|                  |                  |                | X                       | Y         | Z         |
| 1                | 6                | 0              | 7.744404                | -0.501022 | 1.116737  |
| 2                | 6                | 0              | 6.546978                | 0.208093  | 1.051237  |
| 3                | 6                | 0              | 6.047033                | 0.631694  | -0.186153 |
| 4                | 6                | 0              | 6.750791                | 0.354267  | -1.350667 |
| 5                | 6                | 0              | 7.953939                | -0.355732 | -1.295193 |
| 6                | 6                | 0              | 8.458849                | -0.788324 | -0.066177 |
| 7                | 1                | 0              | 5.988338                | 0.428867  | 1.950857  |
| 8                | 1                | 0              | 6.381268                | 0.659998  | -2.322185 |
| 9                | 8                | 0              | 8.583472                | -0.665521 | -2.472147 |
| 10               | 8                | 0              | 9.656503                | -1.452146 | -0.013063 |
| 11               | 8                | 0              | 8.310706                | -0.965942 | 2.263995  |
| 12               | 6                | 0              | 9.553090                | -2.872565 | 0.159203  |
| 13               | 1                | 0              | 10.574403               | -3.252200 | 0.161602  |
| 14               | 1                | 0              | 9.072135                | -3.114978 | 1.109939  |
| 15               | 1                | 0              | 8.997296                | -3.321780 | -0.669615 |
| 16               | 6                | 0              | 7.662600                | -0.688047 | 3.498775  |
| 17               | 1                | 0              | 6.665053                | -1.138767 | 3.540025  |
| 18               | 1                | 0              | 8.291264                | -1.131757 | 4.268657  |
| 19               | 1                | 0              | 7.583393                | 0.390283  | 3.673482  |
| 20               | 6                | 0              | 9.865209                | -0.055670 | -2.682249 |
| 21               | 1                | 0              | 10.576702               | -0.356701 | -1.911900 |
| 22               | 1                | 0              | 10.204527               | -0.402507 | -3.657787 |
| 23               | 1                | 0              | 9.771927                | 1.035930  | -2.698707 |
| 24               | 6                | 0              | 4.744430                | 1.379564  | -0.242634 |
| 25               | 1                | 0              | 4.708321                | 2.159601  | 0.526267  |
| 26               | 1                | 0              | 4.610708                | 1.847424  | -1.222766 |
| 27               | 8                | 0              | 3.673430                | 0.442092  | -0.007324 |
| 28               | 6                | 0              | 2.398920                | 0.892046  | 0.022211  |
| 29               | 6                | 0              | 1.416610                | -0.081339 | 0.264685  |
| 30               | 6                | 0              | 2.014576                | 2.227831  | -0.163118 |
| 31               | 6                | 0              | 0.080994                | 0.270535  | 0.313012  |
| 32               | 1                | 0              | 1.734614                | -1.104971 | 0.417105  |
| 33               | 6                | 0              | 0.670812                | 2.569566  | -0.103277 |
| 34               | 1                | 0              | 2.748433                | 2.998777  | -0.351993 |
| 35               | 6                | 0              | -0.317814               | 1.606145  | 0.123265  |
| 36               | 1                | 0              | -0.642079               | -0.507391 | 0.529936  |
| 37               | 1                | 0              | 0.362818                | 3.599365  | -0.234530 |
| 38               | 6                | 0              | -1.722480               | 2.081337  | 0.178431  |
| 39               | 8                | 0              | -2.051154               | 3.239712  | 0.286272  |
| 40               | 7                | 0              | -2.696467               | 1.054788  | 0.067499  |

|    |    |   |            |           |           |
|----|----|---|------------|-----------|-----------|
| 41 | 1  | 0 | -2.449556  | 0.085864  | -0.166735 |
| 42 | 7  | 0 | -3.973028  | 1.324003  | 0.167750  |
| 43 | 6  | 0 | -4.818518  | 0.250742  | -0.024319 |
| 44 | 7  | 0 | -6.102136  | 0.716549  | 0.120982  |
| 45 | 1  | 0 | -6.103373  | 1.708648  | 0.331609  |
| 46 | 16 | 0 | -4.319223  | -1.318672 | -0.368668 |
| 47 | 6  | 0 | -7.360690  | 0.128055  | 0.041025  |
| 48 | 6  | 0 | -8.458091  | 0.980142  | 0.287038  |
| 49 | 6  | 0 | -7.596541  | -1.223277 | -0.264468 |
| 50 | 6  | 0 | -9.752734  | 0.503145  | 0.232242  |
| 51 | 1  | 0 | -8.282045  | 2.024170  | 0.523076  |
| 52 | 6  | 0 | -8.898879  | -1.699275 | -0.318960 |
| 53 | 1  | 0 | -6.767975  | -1.885179 | -0.456248 |
| 54 | 6  | 0 | -9.962839  | -0.840363 | -0.071667 |
| 55 | 1  | 0 | -10.600755 | 1.146458  | 0.419363  |
| 56 | 1  | 0 | -9.099613  | -2.735465 | -0.552928 |
| 57 | 7  | 0 | -11.339827 | -1.355863 | -0.131088 |
| 58 | 8  | 0 | -12.250559 | -0.566578 | 0.090596  |
| 59 | 8  | 0 | -11.492638 | -2.541187 | -0.398042 |

-----  
 Rotational constants (GHZ): 0.3176963 0.0189554 0.0186597

Standard basis: 6-311++G(d,p) (5D, 7F)

There are 961 symmetry adapted basis functions of A<sub>1</sub> symmetry.

Integral buffers will be 131072 words long.

Raffenetti 2 integral format.

Two-electron integral symmetry is turned on.

961 basis functions, 1517 primitive gaussians, 997 cartesian basis functions

134 alpha electrons 133 beta electrons

nuclear repulsion energy 3446.3251842152 Hartrees.

NAtoms= 59 NActive= 59 NUniq= 59 SFac= 1.00D+00 NAtFMM= 60 NAOKFM=F Big=F

-----  
 Polarizable Continuum Model (PCM)

=====  
 Model : PCM.

Atomic radii : UFF (Universal Force Field).

Polarization charges : Total charges.

Charge compensation : None.

Solution method : Matrix inversion.

Cavity type : Scaled VdW (van der Waals Surface) (Alpha=1.100).

Cavity algorithm : GePol (No added spheres)

Default sphere list used, NSphG= 59.

Lebedev-Laikov grids with approx. 5.0 points / Ang\*\*2.

Smoothing algorithm: Karplus/York (Gamma=1.0000).

Polarization charges: spherical gaussians, with  
 point-specific exponents (IZeta= 3).

Self-potential: point-specific (ISelfS= 7).

Self-field : sphere-specific E.n sum rule (ISelfD= 2).

Solvent : DiMethylSulfoxide, Eps= 46.826000 Eps(inf)= 2.007889

-----  
**3f-r3.out**

## Title Card Required

-----  
Charge = 0 Multiplicity = 2

Symbolic Z-Matrix:

|   |           |          |          |
|---|-----------|----------|----------|
| C | -7.25233  | -0.34735 | -1.06211 |
| C | -5.89638  | -0.07126 | -0.88072 |
| C | -5.48945  | 0.80058  | 0.1389   |
| C | -6.43724  | 1.40351  | 0.96039  |
| C | -7.80007  | 1.13735  | 0.77862  |
| C | -8.21822  | 0.25814  | -0.22704 |
| H | -5.14577  | -0.53983 | -1.5041  |
| H | -6.14893  | 2.07433  | 1.76332  |
| O | -8.69317  | 1.70167  | 1.65476  |
| O | -9.5573   | 0.01663  | -0.41765 |
| O | -7.75179  | -1.19358 | -2.00813 |
| C | -10.01601 | -1.24121 | 0.09155  |
| H | -11.08868 | -1.2781  | -0.10845 |
| H | -9.52205  | -2.07458 | -0.41778 |
| H | -9.84401  | -1.31113 | 1.17201  |
| C | -6.83439  | -1.83877 | -2.87969 |
| H | -6.13421  | -2.47895 | -2.32866 |
| H | -7.43872  | -2.45508 | -3.54645 |
| H | -6.26574  | -1.11347 | -3.47466 |
| C | -9.63355  | 2.62127  | 1.08718  |
| H | -10.26926 | 2.13338  | 0.34444  |
| H | -10.24263 | 2.98007  | 1.91921  |
| H | -9.11483  | 3.47236  | 0.62758  |
| C | -4.0288   | 1.13436  | 0.30606  |
| H | -3.6881   | 1.8082   | -0.49339 |
| H | -3.85886  | 1.6365   | 1.26638  |
| O | -3.26556  | -0.07943 | 0.24459  |
| C | -1.91412  | -0.01327 | 0.32346  |
| C | -1.24095  | -1.24458 | 0.22409  |
| C | -1.18134  | 1.17377  | 0.49716  |
| C | 0.13969   | -1.29182 | 0.29318  |
| H | -1.83103  | -2.14541 | 0.09505  |
| C | 0.20527   | 1.11582  | 0.56507  |
| H | -1.68119  | 2.13055  | 0.58223  |
| C | 0.88502   | -0.107   | 0.46407  |
| H | 0.65912   | -2.23983 | 0.21753  |
| H | 0.78643   | 2.02182  | 0.69996  |
| C | 2.35266   | -0.10933 | 0.54584  |
| O | 3.04424   | 0.90551  | 0.69885  |
| N | 2.93533   | -1.3931  | 0.4261   |
| N | 4.2443    | -1.28851 | 0.54213  |
| C | 5.1015    | -2.36967 | 0.5128   |
| N | 6.43999   | -2.02493 | 0.51086  |
| S | 4.62061   | -3.95887 | 0.56012  |
| C | 7.10355   | -0.83891 | 0.15585  |
| C | 6.57442   | 0.10538  | -0.74392 |
| C | 8.38751   | -0.63235 | 0.69684  |
| C | 7.30336   | 1.24375  | -1.06653 |

|   |          |          |          |
|---|----------|----------|----------|
| H | 5.61329  | -0.05624 | -1.21602 |
| C | 9.12189  | 0.49471  | 0.36358  |
| H | 8.79722  | -1.35931 | 1.39155  |
| C | 8.56667  | 1.42942  | -0.5106  |
| H | 6.91294  | 1.98023  | -1.75726 |
| H | 10.10808 | 0.66994  | 0.77427  |
| N | 9.33518  | 2.62763  | -0.85953 |
| O | 8.81646  | 3.43499  | -1.63097 |
| O | 10.45415 | 2.75319  | -0.3602  |
| H | 4.58588  | -0.33069 | 0.70998  |
| H | 7.02917  | -2.81759 | 0.73     |

Stoichiometry C<sub>24</sub>H<sub>23</sub>N<sub>4</sub>O<sub>7</sub>S(2)

Framework group C1[X(C<sub>24</sub>H<sub>23</sub>N<sub>4</sub>O<sub>7</sub>S)]

Deg. of freedom 171

Full point group C1 NOp 1

Largest Abelian subgroup C1 NOp 1

Largest concise Abelian subgroup C1 NOp 1

Standard orientation:

| Center<br>Number | Atomic<br>Number | Atomic<br>Type | Coordinates (Angstroms) |           |           |
|------------------|------------------|----------------|-------------------------|-----------|-----------|
|                  |                  |                | X                       | Y         | Z         |
| 1                | 6                | 0              | -7.252332               | 0.347345  | 1.062105  |
| 2                | 6                | 0              | -5.896380               | 0.071256  | 0.880719  |
| 3                | 6                | 0              | -5.489449               | -0.800583 | -0.138900 |
| 4                | 6                | 0              | -6.437236               | -1.403505 | -0.960385 |
| 5                | 6                | 0              | -7.800065               | -1.137350 | -0.778616 |
| 6                | 6                | 0              | -8.218218               | -0.258137 | 0.227040  |
| 7                | 1                | 0              | -5.145773               | 0.539825  | 1.504097  |
| 8                | 1                | 0              | -6.148926               | -2.074330 | -1.763323 |
| 9                | 8                | 0              | -8.693173               | -1.701673 | -1.654759 |
| 10               | 8                | 0              | -9.557303               | -0.016628 | 0.417646  |
| 11               | 8                | 0              | -7.751787               | 1.193582  | 2.008130  |
| 12               | 6                | 0              | -10.016015              | 1.241210  | -0.091549 |
| 13               | 1                | 0              | -11.088678              | 1.278101  | 0.108453  |
| 14               | 1                | 0              | -9.522055               | 2.074582  | 0.417775  |
| 15               | 1                | 0              | -9.844007               | 1.311130  | -1.172006 |
| 16               | 6                | 0              | -6.834394               | 1.838765  | 2.879690  |
| 17               | 1                | 0              | -6.134206               | 2.478948  | 2.328662  |
| 18               | 1                | 0              | -7.438720               | 2.455080  | 3.546446  |
| 19               | 1                | 0              | -6.265743               | 1.113468  | 3.474663  |
| 20               | 6                | 0              | -9.633549               | -2.621274 | -1.087181 |
| 21               | 1                | 0              | -10.269262              | -2.133380 | -0.344441 |
| 22               | 1                | 0              | -10.242634              | -2.980068 | -1.919214 |
| 23               | 1                | 0              | -9.114826               | -3.472361 | -0.627581 |
| 24               | 6                | 0              | -4.028796               | -1.134356 | -0.306062 |
| 25               | 1                | 0              | -3.688103               | -1.808202 | 0.493390  |
| 26               | 1                | 0              | -3.858856               | -1.636503 | -1.266383 |
| 27               | 8                | 0              | -3.265557               | 0.079427  | -0.244593 |
| 28               | 6                | 0              | -1.914119               | 0.013265  | -0.323456 |
| 29               | 6                | 0              | -1.240951               | 1.244582  | -0.224088 |
| 30               | 6                | 0              | -1.181341               | -1.173773 | -0.497159 |

|    |    |   |           |           |           |
|----|----|---|-----------|-----------|-----------|
| 31 | 6  | 0 | 0.139692  | 1.291816  | -0.293184 |
| 32 | 1  | 0 | -1.831031 | 2.145409  | -0.095048 |
| 33 | 6  | 0 | 0.205272  | -1.115818 | -0.565066 |
| 34 | 1  | 0 | -1.681193 | -2.130548 | -0.582231 |
| 35 | 6  | 0 | 0.885020  | 0.107004  | -0.464074 |
| 36 | 1  | 0 | 0.659120  | 2.239832  | -0.217529 |
| 37 | 1  | 0 | 0.786432  | -2.021816 | -0.699959 |
| 38 | 6  | 0 | 2.352664  | 0.109325  | -0.545844 |
| 39 | 8  | 0 | 3.044236  | -0.905511 | -0.698847 |
| 40 | 7  | 0 | 2.935332  | 1.393101  | -0.426104 |
| 41 | 7  | 0 | 4.244298  | 1.288513  | -0.542130 |
| 42 | 6  | 0 | 5.101503  | 2.369671  | -0.512799 |
| 43 | 7  | 0 | 6.439994  | 2.024925  | -0.510864 |
| 44 | 16 | 0 | 4.620612  | 3.958874  | -0.560122 |
| 45 | 6  | 0 | 7.103554  | 0.838913  | -0.155852 |
| 46 | 6  | 0 | 6.574420  | -0.105379 | 0.743917  |
| 47 | 6  | 0 | 8.387506  | 0.632349  | -0.696842 |
| 48 | 6  | 0 | 7.303360  | -1.243746 | 1.066531  |
| 49 | 1  | 0 | 5.613291  | 0.056244  | 1.216021  |
| 50 | 6  | 0 | 9.121888  | -0.494709 | -0.363579 |
| 51 | 1  | 0 | 8.797215  | 1.359310  | -1.391549 |
| 52 | 6  | 0 | 8.566671  | -1.429418 | 0.510595  |
| 53 | 1  | 0 | 6.912940  | -1.980232 | 1.757263  |
| 54 | 1  | 0 | 10.108077 | -0.669942 | -0.774271 |
| 55 | 7  | 0 | 9.335182  | -2.627629 | 0.859530  |
| 56 | 8  | 0 | 8.816457  | -3.434994 | 1.630965  |
| 57 | 8  | 0 | 10.454153 | -2.753192 | 0.360195  |
| 58 | 1  | 0 | 4.585875  | 0.330688  | -0.709984 |
| 59 | 1  | 0 | 7.029174  | 2.817594  | -0.729998 |

-----  
 Rotational constants (GHZ): 0.2469945 0.0220726 0.0210274

Standard basis: 6-311++G(d,p) (5D, 7F)

There are 961 symmetry adapted basis functions of A symmetry.

Integral buffers will be 131072 words long.

Raffenetti 2 integral format.

Two-electron integral symmetry is turned on.

961 basis functions, 1517 primitive gaussians, 997 cartesian basis functions

134 alpha electrons 133 beta electrons

nuclear repulsion energy 3504.7123107818 Hartrees.

NAtoms= 59 NActive= 59 NUniq= 59 SFac= 1.00D+00 NAtFMM= 60 NAOKFM=F Big=F

-----  
 Polarizable Continuum Model (PCM)

=====  
 Model : PCM.

Atomic radii : UFF (Universal Force Field).

Polarization charges : Total charges.

Charge compensation : None.

Solution method : Matrix inversion.

Cavity type : Scaled VdW (van der Waals Surface) (Alpha=1.100).

Cavity algorithm : GePol (No added spheres)

Default sphere list used, NSphG= 59.

Lebedev-Laikov grids with approx. 5.0 points / Ang\*\*2.

Smoothing algorithm: Karplus/York (Gamma=1.0000).  
Polarization charges: spherical gaussians, with  
point-specific exponents (IZeta= 3).  
Self-potential: point-specific (ISelfS= 7).  
Self-field : sphere-specific E.n sum rule (ISelfD= 2).  
Solvent : DiMethylSulfoxide, Eps= 46.826000 Eps(inf)= 2.007889

---

**6a.out**

---

Title Card Required

---

Charge = 0 Multiplicity = 1

Symbolic Z-Matrix:

|   |           |          |          |
|---|-----------|----------|----------|
| C | -8.56406  | 0.95725  | 0.04481  |
| C | -7.18897  | 0.69089  | 0.08968  |
| C | -6.73393  | -0.6323  | 0.16753  |
| C | -7.65371  | -1.68901 | 0.20055  |
| C | -9.02868  | -1.42243 | 0.15642  |
| C | -9.48376  | -0.09942 | 0.07857  |
| H | -6.48653  | 1.49764  | 0.06462  |
| H | -7.30612  | -2.69932 | 0.25952  |
| O | -9.96769  | -2.50025 | 0.19097  |
| O | -10.887   | 0.17231  | 0.03385  |
| O | -9.02901  | 2.30701  | -0.03543 |
| C | -11.11688 | 1.37378  | -0.7069  |
| H | -12.16682 | 1.5774   | -0.73904 |
| H | -10.61009 | 2.18799  | -0.23234 |
| H | -10.7459  | 1.25508  | -1.7035  |
| C | -8.09412  | 3.17261  | 0.61356  |
| H | -7.14187  | 3.0943   | 0.13191  |
| H | -8.4422   | 4.18258  | 0.55362  |
| H | -7.99863  | 2.88854  | 1.64073  |
| C | -10.31331 | -2.78756 | 1.5485   |
| H | -10.74966 | -1.91941 | 1.99679  |
| H | -11.01614 | -3.59393 | 1.57458  |
| H | -9.4328   | -3.06415 | 2.08993  |
| C | -5.22309  | -0.92546 | 0.21671  |
| H | -5.09077  | -1.80405 | 0.81293  |
| O | -4.49322  | -1.12451 | -0.99684 |
| C | -3.14092  | -0.69741 | -0.81427 |
| C | -2.10845  | -1.3133  | -1.53426 |
| C | -2.84818  | 0.33685  | 0.08477  |
| C | -0.78287  | -0.89595 | -1.35407 |
| H | -2.33225  | -2.10233 | -2.22148 |
| C | -1.52262  | 0.75403  | 0.2652   |
| H | -3.63672  | 0.80801  | 0.6335   |
| C | -0.4899   | 0.13698  | -0.45344 |
| H | 0.00556   | -1.36608 | -1.90405 |
| H | -1.299    | 1.54359  | 0.95188  |
| C | 0.96705   | 0.59348  | -0.25334 |
| C | 3.13428   | 0.55373  | -0.12454 |

|    |          |          |          |
|----|----------|----------|----------|
| O  | 2.08496  | 0.01874  | -0.93843 |
| N  | 1.32381  | 1.53555  | 0.55719  |
| N  | 2.71879  | 1.51006  | 0.64004  |
| S  | 4.81333  | -0.03629 | -0.15631 |
| C  | 5.9216   | 1.29621  | 0.24883  |
| H  | 5.69339  | 1.66558  | 1.22678  |
| C  | 7.37294  | 0.78204  | 0.2197   |
| C  | 8.11197  | 0.8377   | -0.96975 |
| C  | 7.95466  | 0.25818  | 1.38216  |
| C  | 9.43236  | 0.36894  | -0.99692 |
| H  | 7.66803  | 1.23804  | -1.85719 |
| C  | 9.27522  | -0.21006 | 1.35499  |
| H  | 7.39067  | 0.21569  | 2.29049  |
| C  | 10.01402 | -0.15465 | 0.16556  |
| H  | 9.99633  | 0.41078  | -1.90526 |
| H  | 9.71947  | -0.60995 | 2.24241  |
| Br | 11.8138  | -0.79286 | 0.12913  |
| H  | 5.80792  | 2.08468  | -0.46554 |
| H  | -4.75983 | -0.11164 | 0.73438  |

Stoichiometry C<sub>25</sub>H<sub>23</sub>BrN<sub>2</sub>O<sub>5</sub>S

Framework group C1[X(C<sub>25</sub>H<sub>23</sub>BrN<sub>2</sub>O<sub>5</sub>S)]

Deg. of freedom 165

Full point group C1 NOp 1

Largest Abelian subgroup C1 NOp 1

Largest concise Abelian subgroup C1 NOp 1

Standard orientation:

| Center<br>Number | Atomic<br>Number | Atomic<br>Type | Coordinates (Angstroms) |           |           |
|------------------|------------------|----------------|-------------------------|-----------|-----------|
|                  |                  |                | X                       | Y         | Z         |
| 1                | 6                | 0              | -8.545308               | 0.963203  | 0.043570  |
| 2                | 6                | 0              | -7.170309               | 0.696358  | 0.088269  |
| 3                | 6                | 0              | -6.715691               | -0.627074 | 0.164447  |
| 4                | 6                | 0              | -7.635803               | -1.683541 | 0.195960  |
| 5                | 6                | 0              | -9.010681               | -1.416481 | 0.152001  |
| 6                | 6                | 0              | -9.465344               | -0.093227 | 0.075826  |
| 7                | 1                | 0              | -6.467620               | 1.502923  | 0.064358  |
| 8                | 1                | 0              | -7.288532               | -2.694036 | 0.253651  |
| 9                | 8                | 0              | -9.950030               | -2.494053 | 0.185014  |
| 10               | 8                | 0              | -10.868489              | 0.178996  | 0.031283  |
| 11               | 8                | 0              | -9.009829               | 2.313214  | -0.034956 |
| 12               | 6                | 0              | -11.097906              | 1.381504  | -0.707918 |
| 13               | 1                | 0              | -12.147775              | 1.585494  | -0.739929 |
| 14               | 1                | 0              | -10.590921              | 2.194942  | -0.232222 |
| 15               | 1                | 0              | -10.726830              | 1.264005  | -1.704625 |
| 16               | 6                | 0              | -8.074757               | 3.177668  | 0.615294  |
| 17               | 1                | 0              | -7.122466               | 3.099691  | 0.133661  |
| 18               | 1                | 0              | -8.422517               | 4.187821  | 0.556630  |
| 19               | 1                | 0              | -7.979485               | 2.892224  | 1.642094  |
| 20               | 6                | 0              | -10.295914              | -2.783033 | 1.542124  |
| 21               | 1                | 0              | -10.732054              | -1.915334 | 1.991496  |
| 22               | 1                | 0              | -10.998995              | -3.589220 | 1.567056  |

|    |    |   |           |           |           |
|----|----|---|-----------|-----------|-----------|
| 23 | 1  | 0 | -9.415561 | -3.060605 | 2.083301  |
| 24 | 6  | 0 | -5.204942 | -0.920767 | 0.213429  |
| 25 | 1  | 0 | -5.072976 | -1.800175 | 0.808515  |
| 26 | 8  | 0 | -4.474980 | -1.118447 | -1.000280 |
| 27 | 6  | 0 | -3.122568 | -0.692005 | -0.816980 |
| 28 | 6  | 0 | -2.090201 | -1.307267 | -1.537647 |
| 29 | 6  | 0 | -2.829624 | 0.340982  | 0.083453  |
| 30 | 6  | 0 | -0.764511 | -0.890573 | -1.356731 |
| 31 | 1  | 0 | -2.314153 | -2.095326 | -2.225922 |
| 32 | 6  | 0 | -1.503965 | 0.757516  | 0.264601  |
| 33 | 1  | 0 | -3.618097 | 0.811660  | 0.632701  |
| 34 | 6  | 0 | -0.471342 | 0.141088  | -0.454708 |
| 35 | 1  | 0 | 0.023838  | -1.360220 | -1.907227 |
| 36 | 1  | 0 | -1.280184 | 1.546099  | 0.952348  |
| 37 | 6  | 0 | 0.985729  | 0.596868  | -0.253826 |
| 38 | 6  | 0 | 3.152926  | 0.556281  | -0.124800 |
| 39 | 8  | 0 | 2.103544  | 0.022683  | -0.939530 |
| 40 | 7  | 0 | 1.342673  | 1.537769  | 0.557987  |
| 41 | 7  | 0 | 2.737633  | 1.511739  | 0.640982  |
| 42 | 16 | 0 | 4.831802  | -0.034217 | -0.157127 |
| 43 | 6  | 0 | 5.940428  | 1.297411  | 0.249902  |
| 44 | 1  | 0 | 5.712203  | 1.665563  | 1.228304  |
| 45 | 6  | 0 | 7.391609  | 0.782825  | 0.220286  |
| 46 | 6  | 0 | 8.130817  | 0.839824  | -0.968997 |
| 47 | 6  | 0 | 7.973024  | 0.257266  | 1.382128  |
| 48 | 6  | 0 | 9.451063  | 0.370686  | -0.996607 |
| 49 | 1  | 0 | 7.687107  | 1.241461  | -1.855970 |
| 50 | 6  | 0 | 9.293434  | -0.211353 | 1.354520  |
| 51 | 1  | 0 | 7.408894  | 0.213759  | 2.290334  |
| 52 | 6  | 0 | 10.032409 | -0.154604 | 0.165260  |
| 53 | 1  | 0 | 10.015161 | 0.413547  | -1.904820 |
| 54 | 1  | 0 | 9.737447  | -0.612540 | 2.241471  |
| 55 | 35 | 0 | 11.831994 | -0.793325 | 0.128225  |
| 56 | 1  | 0 | 5.827079  | 2.086851  | -0.463448 |
| 57 | 1  | 0 | -4.741496 | -0.107773 | 0.732232  |

-----  
 Rotational constants (GHZ):      0.4573226      0.0149723      0.0147207

Standard basis: 6-311++G(d,p) (5D, 7F)

There are 943 symmetry adapted basis functions of A symmetry.

Integral buffers will be 131072 words long.

Raffenetti 2 integral format.

Two-electron integral symmetry is turned on.

943 basis functions, 1503 primitive gaussians, 979 cartesian basis functions

139 alpha electrons      139 beta electrons

nuclear repulsion energy      3499.1181818346 Hartrees.

NAtoms= 57 NActive= 57 NUniq= 57 SFac= 1.00D+00 NAtFMM= 60 NAOKFM=F Big=F

-----  
 Polarizable Continuum Model (PCM)

=====  
 Model                            : PCM.

Atomic radii                    : UFF (Universal Force Field).

Polarization charges : Total charges.



Charge compensation : None.  
 Solution method : Matrix inversion.  
 Cavity type : Scaled VdW (van der Waals Surface) (Alpha=1.100).  
 Cavity algorithm : GePol (No added spheres)  
     Default sphere list used, NSphG= 57.  
     Lebedev-Laikov grids with approx. 5.0 points / Ang\*\*2.  
     Smoothing algorithm: Karplus/York (Gamma=1.0000).  
     Polarization charges: spherical gaussians, with  
                                 point-specific exponents (IZeta= 3).  
     Self-potential: point-specific (ISelfS= 7).  
     Self-field : sphere-specific E.n sum rule (ISelfD= 2).  
 Solvent : DiMethylSulfoxide, Eps= 46.826000 Eps(inf)= 2.007889

### R16a.out

Title Card Required

Charge = 0 Multiplicity = 2

Symbolic Z-Matrix:

|   |          |          |          |
|---|----------|----------|----------|
| C | 8.75717  | -0.63304 | -0.45078 |
| C | 7.37681  | -0.70637 | -0.21526 |
| C | 6.65089  | 0.45961  | 0.06503  |
| C | 7.30552  | 1.69771  | 0.11133  |
| C | 8.68415  | 1.77096  | -0.12462 |
| C | 9.41051  | 0.60668  | -0.40684 |
| H | 6.87713  | -1.65206 | -0.24939 |
| H | 6.75216  | 2.58774  | 0.32701  |
| O | 9.35091  | 3.03431  | -0.07735 |
| O | 10.81843 | 0.68603  | -0.64926 |
| O | 9.49797  | -1.82244 | -0.73527 |
| C | 11.20852 | -0.3498  | -1.55447 |
| H | 12.26134 | -0.28725 | -1.73564 |
| H | 10.97599 | -1.3027  | -1.12738 |
| H | 10.68031 | -0.23408 | -2.47781 |
| C | 8.88185  | -2.93335 | -0.07875 |
| H | 7.87837  | -3.04426 | -0.43271 |
| H | 9.43513  | -3.82459 | -0.28969 |
| H | 8.87079  | -2.76224 | 0.97752  |
| C | 9.81053  | 3.27899  | 1.25409  |
| H | 10.48855 | 2.50395  | 1.5451   |
| H | 10.3116  | 4.22364  | 1.2903   |
| H | 8.9755   | 3.29217  | 1.92322  |
| C | 5.13389  | 0.38389  | 0.32313  |
| H | 4.95743  | 0.23907  | 1.36862  |
| H | 4.6732   | 1.29624  | 0.00601  |
| O | 4.57527  | -0.71052 | -0.40953 |
| C | 3.16674  | -0.77137 | -0.16625 |
| C | 2.28145  | -0.06998 | -0.99643 |
| C | 2.67141  | -1.53109 | 0.90248  |
| C | 0.90168  | -0.12324 | -0.75417 |
| H | 2.65901  | 0.50643  | -1.81491 |

|    |           |          |          |
|----|-----------|----------|----------|
| C  | 1.29178   | -1.58379 | 1.14479  |
| H  | 3.34622   | -2.0703  | 1.53384  |
| C  | 0.40708   | -0.87804 | 0.31806  |
| H  | 0.22638   | 0.41287  | -1.38752 |
| H  | 0.91363   | -2.1627  | 1.9615   |
| C  | -1.10872  | -0.93176 | 0.58927  |
| C  | -3.2002   | -0.3538  | 0.69885  |
| O  | -2.08825  | -0.24323 | -0.19715 |
| N  | -1.64449  | -1.59865 | 1.55894  |
| N  | -2.98987  | -1.22576 | 1.62991  |
| S  | -4.69407  | 0.60509  | 0.55323  |
| C  | -6.06484  | -0.31431 | 1.22181  |
| H  | -5.90163  | -1.01749 | 2.01174  |
| C  | -7.48565  | -0.09744 | 0.66574  |
| C  | -7.95003  | -0.88102 | -0.39998 |
| C  | -8.31487  | 0.88429  | 1.22646  |
| C  | -9.2441   | -0.68484 | -0.9022  |
| H  | -7.31688  | -1.62886 | -0.82983 |
| C  | -9.60842  | 1.08066  | 0.72346  |
| H  | -7.96029  | 1.48402  | 2.03852  |
| C  | -10.07326 | 0.29601  | -0.34038 |
| H  | -9.59894  | -1.28402 | -1.71451 |
| H  | -10.24158 | 1.8297   | 1.15175  |
| Br | -11.8369  | 0.56393  | -1.02362 |

Stoichiometry C<sub>25</sub>H<sub>22</sub>BrN<sub>2</sub>O<sub>5</sub>S(2)

Framework group C1[X(C<sub>25</sub>H<sub>22</sub>BrN<sub>2</sub>O<sub>5</sub>S)]

Deg. of freedom 162

Full point group C1 NOp 1

Largest Abelian subgroup C1 NOp 1

Largest concise Abelian subgroup C1 NOp 1

Standard orientation:

| Center<br>Number | Atomic<br>Number | Atomic<br>Type | Coordinates (Angstroms) |           |           |
|------------------|------------------|----------------|-------------------------|-----------|-----------|
|                  |                  |                | X                       | Y         | Z         |
| 1                | 6                | 0              | 8.757165                | -0.633039 | -0.450782 |
| 2                | 6                | 0              | 7.376806                | -0.706365 | -0.215260 |
| 3                | 6                | 0              | 6.650889                | 0.459608  | 0.065031  |
| 4                | 6                | 0              | 7.305519                | 1.697707  | 0.111332  |
| 5                | 6                | 0              | 8.684150                | 1.770964  | -0.124621 |
| 6                | 6                | 0              | 9.410511                | 0.606675  | -0.406842 |
| 7                | 1                | 0              | 6.877128                | -1.652061 | -0.249393 |
| 8                | 1                | 0              | 6.752161                | 2.587739  | 0.327007  |
| 9                | 8                | 0              | 9.350914                | 3.034311  | -0.077351 |
| 10               | 8                | 0              | 10.818431               | 0.686028  | -0.649263 |
| 11               | 8                | 0              | 9.497969                | -1.822439 | -0.735269 |
| 12               | 6                | 0              | 11.208515               | -0.349797 | -1.554474 |
| 13               | 1                | 0              | 12.261338               | -0.287253 | -1.735643 |
| 14               | 1                | 0              | 10.975993               | -1.302703 | -1.127382 |
| 15               | 1                | 0              | 10.680314               | -0.234081 | -2.477812 |
| 16               | 6                | 0              | 8.881852                | -2.933345 | -0.078750 |
| 17               | 1                | 0              | 7.878371                | -3.044258 | -0.432712 |

|    |    |   |            |           |           |
|----|----|---|------------|-----------|-----------|
| 18 | 1  | 0 | 9.435133   | -3.824585 | -0.289690 |
| 19 | 1  | 0 | 8.870794   | -2.762241 | 0.977517  |
| 20 | 6  | 0 | 9.810529   | 3.278990  | 1.254089  |
| 21 | 1  | 0 | 10.488547  | 2.503953  | 1.545095  |
| 22 | 1  | 0 | 10.311603  | 4.223636  | 1.290295  |
| 23 | 1  | 0 | 8.975502   | 3.292174  | 1.923222  |
| 24 | 6  | 0 | 5.133893   | 0.383891  | 0.323127  |
| 25 | 1  | 0 | 4.957434   | 0.239070  | 1.368621  |
| 26 | 1  | 0 | 4.673200   | 1.296241  | 0.006010  |
| 27 | 8  | 0 | 4.575268   | -0.710519 | -0.409534 |
| 28 | 6  | 0 | 3.166738   | -0.771374 | -0.166245 |
| 29 | 6  | 0 | 2.281449   | -0.069979 | -0.996432 |
| 30 | 6  | 0 | 2.671413   | -1.531091 | 0.902475  |
| 31 | 6  | 0 | 0.901684   | -0.123236 | -0.754166 |
| 32 | 1  | 0 | 2.659013   | 0.506427  | -1.814911 |
| 33 | 6  | 0 | 1.291781   | -1.583790 | 1.144790  |
| 34 | 1  | 0 | 3.346223   | -2.070296 | 1.533842  |
| 35 | 6  | 0 | 0.407075   | -0.878040 | 0.318055  |
| 36 | 1  | 0 | 0.226379   | 0.412871  | -1.387517 |
| 37 | 1  | 0 | 0.913628   | -2.162704 | 1.961501  |
| 38 | 6  | 0 | -1.108716  | -0.931759 | 0.589268  |
| 39 | 6  | 0 | -3.200204  | -0.353803 | 0.698849  |
| 40 | 8  | 0 | -2.088251  | -0.243225 | -0.197153 |
| 41 | 7  | 0 | -1.644487  | -1.598653 | 1.558941  |
| 42 | 7  | 0 | -2.989873  | -1.225755 | 1.629909  |
| 43 | 16 | 0 | -4.694069  | 0.605093  | 0.553225  |
| 44 | 6  | 0 | -6.064843  | -0.314307 | 1.221807  |
| 45 | 1  | 0 | -5.901631  | -1.017492 | 2.011738  |
| 46 | 6  | 0 | -7.485654  | -0.097442 | 0.665739  |
| 47 | 6  | 0 | -7.950032  | -0.881022 | -0.399984 |
| 48 | 6  | 0 | -8.314871  | 0.884291  | 1.226461  |
| 49 | 6  | 0 | -9.244103  | -0.684835 | -0.902203 |
| 50 | 1  | 0 | -7.316877  | -1.628858 | -0.829828 |
| 51 | 6  | 0 | -9.608418  | 1.080656  | 0.723460  |
| 52 | 1  | 0 | -7.960291  | 1.484017  | 2.038517  |
| 53 | 6  | 0 | -10.073264 | 0.296013  | -0.340383 |
| 54 | 1  | 0 | -9.598935  | -1.284022 | -1.714514 |
| 55 | 1  | 0 | -10.241582 | 1.829698  | 1.151750  |
| 56 | 35 | 0 | -11.836904 | 0.563926  | -1.023621 |

-----  
 Rotational constants (GHZ): 0.4001542 0.0148916 0.0146896

Standard basis: 6-311++G(d,p) (5D, 7F)

There are 936 symmetry adapted basis functions of A symmetry.

Integral buffers will be 131072 words long.

Raffenetti 2 integral format.

Two-electron integral symmetry is turned on.

936 basis functions, 1494 primitive gaussians, 972 cartesian basis functions

139 alpha electrons 138 beta electrons

nuclear repulsion energy 3460.6994906169 Hartrees.

NAtoms= 56 NActive= 56 NUniq= 56 SFac= 1.00D+00 NAtFMM= 60 NAOKFM=F Big=F

-----  
 Polarizable Continuum Model (PCM)

```

=====
Model           : PCM.
Atomic radii    : UFF (Universal Force Field).
Polarization charges : Total charges.
Charge compensation : None.
Solution method : Matrix inversion.
Cavity type     : Scaled VdW (van der Waals Surface) (Alpha=1.100).
Cavity algorithm : GePol (No added spheres)
                  Default sphere list used, NSphG= 56.
                  Lebedev-Laikov grids with approx. 5.0 points / Ang**2.
                  Smoothing algorithm: Karplus/York (Gamma=1.0000).
                  Polarization charges: spherical gaussians, with
                                      point-specific exponents (IZeta= 3).
                  Self-potential: point-specific (ISelfS= 7).
                  Self-field : sphere-specific E.n sum rule (ISelfD= 2).
Solvent         : DiMethylSulfoxide, Eps= 46.826000 Eps(inf)= 2.007889
-----

```

### R26a.out

```

-----
Title Card Required
-----

```

Charge = 0 Multiplicity = 2

Symbolic Z-Matrix:

|   |           |          |          |
|---|-----------|----------|----------|
| C | -8.56406  | 0.95725  | 0.04481  |
| C | -7.18897  | 0.69089  | 0.08968  |
| C | -6.73393  | -0.6323  | 0.16753  |
| C | -7.65371  | -1.68901 | 0.20055  |
| C | -9.02868  | -1.42243 | 0.15642  |
| C | -9.48376  | -0.09942 | 0.07857  |
| H | -6.48653  | 1.49764  | 0.06462  |
| H | -7.30612  | -2.69932 | 0.25952  |
| O | -9.96769  | -2.50025 | 0.19097  |
| O | -10.887   | 0.17231  | 0.03385  |
| O | -9.02901  | 2.30701  | -0.03543 |
| C | -11.11688 | 1.37378  | -0.7069  |
| H | -12.16682 | 1.5774   | -0.73904 |
| H | -10.61009 | 2.18799  | -0.23234 |
| H | -10.7459  | 1.25508  | -1.7035  |
| C | -8.09412  | 3.17261  | 0.61356  |
| H | -7.14187  | 3.0943   | 0.13191  |
| H | -8.4422   | 4.18258  | 0.55362  |
| H | -7.99863  | 2.88854  | 1.64073  |
| C | -10.31331 | -2.78756 | 1.5485   |
| H | -10.74966 | -1.91941 | 1.99679  |
| H | -11.01614 | -3.59393 | 1.57458  |
| H | -9.4328   | -3.06415 | 2.08993  |
| C | -5.22309  | -0.92546 | 0.21671  |
| H | -4.71937  | -0.9803  | 1.15907  |
| O | -4.49322  | -1.12451 | -0.99684 |
| C | -3.14092  | -0.69741 | -0.81427 |
| C | -2.10845  | -1.3133  | -1.53426 |

|    |          |          |          |
|----|----------|----------|----------|
| C  | -2.84818 | 0.33685  | 0.08477  |
| C  | -0.78287 | -0.89595 | -1.35407 |
| H  | -2.33225 | -2.10233 | -2.22148 |
| C  | -1.52262 | 0.75403  | 0.2652   |
| H  | -3.63672 | 0.80801  | 0.6335   |
| C  | -0.4899  | 0.13698  | -0.45344 |
| H  | 0.00556  | -1.36608 | -1.90405 |
| H  | -1.299   | 1.54359  | 0.95188  |
| C  | 0.96705  | 0.59348  | -0.25334 |
| C  | 3.13428  | 0.55373  | -0.12454 |
| O  | 2.08496  | 0.01874  | -0.93843 |
| N  | 1.32381  | 1.53555  | 0.55719  |
| N  | 2.71879  | 1.51006  | 0.64004  |
| S  | 4.81333  | -0.03629 | -0.15631 |
| C  | 5.9216   | 1.29621  | 0.24883  |
| H  | 5.69339  | 1.66558  | 1.22678  |
| C  | 7.37294  | 0.78204  | 0.2197   |
| C  | 8.11197  | 0.8377   | -0.96975 |
| C  | 7.95466  | 0.25818  | 1.38216  |
| C  | 9.43236  | 0.36894  | -0.99692 |
| H  | 7.66803  | 1.23804  | -1.85719 |
| C  | 9.27522  | -0.21006 | 1.35499  |
| H  | 7.39067  | 0.21569  | 2.29049  |
| C  | 10.01402 | -0.15465 | 0.16556  |
| H  | 9.99633  | 0.41078  | -1.90526 |
| H  | 9.71947  | -0.60995 | 2.24241  |
| Br | 11.8138  | -0.79286 | 0.12913  |
| H  | 5.80792  | 2.08468  | -0.46554 |

Stoichiometry C<sub>25</sub>H<sub>22</sub>BrN<sub>2</sub>O<sub>5</sub>S(2)

Framework group C1[X(C<sub>25</sub>H<sub>22</sub>BrN<sub>2</sub>O<sub>5</sub>S)]

Deg. of freedom 162

Full point group C1 NOp 1

Largest Abelian subgroup C1 NOp 1

Largest concise Abelian subgroup C1 NOp 1

Standard orientation:

| Center<br>Number | Atomic<br>Number | Atomic<br>Type | Coordinates (Angstroms) |           |           |
|------------------|------------------|----------------|-------------------------|-----------|-----------|
|                  |                  |                | X                       | Y         | Z         |
| 1                | 6                | 0              | -8.564058               | 0.957250  | 0.044806  |
| 2                | 6                | 0              | -7.188970               | 0.690890  | 0.089678  |
| 3                | 6                | 0              | -6.733933               | -0.632301 | 0.167533  |
| 4                | 6                | 0              | -7.653714               | -1.689010 | 0.200551  |
| 5                | 6                | 0              | -9.028680               | -1.422433 | 0.156420  |
| 6                | 6                | 0              | -9.483762               | -0.099421 | 0.078567  |
| 7                | 1                | 0              | -6.486534               | 1.497640  | 0.064618  |
| 8                | 1                | 0              | -7.306122               | -2.699321 | 0.259523  |
| 9                | 8                | 0              | -9.967691               | -2.500252 | 0.190968  |
| 10               | 8                | 0              | -10.886997              | 0.172309  | 0.033848  |
| 11               | 8                | 0              | -9.029007               | 2.307013  | -0.035431 |
| 12               | 6                | 0              | -11.116882              | 1.373775  | -0.706900 |
| 13               | 1                | 0              | -12.166818              | 1.577398  | -0.739043 |

|    |    |   |            |           |           |
|----|----|---|------------|-----------|-----------|
| 14 | 1  | 0 | -10.610088 | 2.187993  | -0.232337 |
| 15 | 1  | 0 | -10.745898 | 1.255083  | -1.703500 |
| 16 | 6  | 0 | -8.094119  | 3.172609  | 0.613564  |
| 17 | 1  | 0 | -7.141866  | 3.094295  | 0.131910  |
| 18 | 1  | 0 | -8.442199  | 4.182576  | 0.553619  |
| 19 | 1  | 0 | -7.998626  | 2.888542  | 1.640725  |
| 20 | 6  | 0 | -10.313311 | -2.787558 | 1.548500  |
| 21 | 1  | 0 | -10.749662 | -1.919405 | 1.996790  |
| 22 | 1  | 0 | -11.016139 | -3.593929 | 1.574581  |
| 23 | 1  | 0 | -9.432802  | -3.064147 | 2.089927  |
| 24 | 6  | 0 | -5.223087  | -0.925462 | 0.216706  |
| 25 | 1  | 0 | -4.719371  | -0.980295 | 1.159067  |
| 26 | 8  | 0 | -4.493220  | -1.124508 | -0.996837 |
| 27 | 6  | 0 | -3.140916  | -0.697407 | -0.814272 |
| 28 | 6  | 0 | -2.108452  | -1.313295 | -1.534264 |
| 29 | 6  | 0 | -2.848176  | 0.336851  | 0.084768  |
| 30 | 6  | 0 | -0.782867  | -0.895954 | -1.354066 |
| 31 | 1  | 0 | -2.332248  | -2.102326 | -2.221475 |
| 32 | 6  | 0 | -1.522623  | 0.754032  | 0.265198  |
| 33 | 1  | 0 | -3.636724  | 0.808005  | 0.633499  |
| 34 | 6  | 0 | -0.489902  | 0.136981  | -0.453435 |
| 35 | 1  | 0 | 0.005556   | -1.366079 | -1.904047 |
| 36 | 1  | 0 | -1.298998  | 1.543586  | 0.951880  |
| 37 | 6  | 0 | 0.967054   | 0.593475  | -0.253340 |
| 38 | 6  | 0 | 3.134280   | 0.553728  | -0.124540 |
| 39 | 8  | 0 | 2.084958   | 0.018737  | -0.938434 |
| 40 | 7  | 0 | 1.323811   | 1.535551  | 0.557192  |
| 41 | 7  | 0 | 2.718790   | 1.510061  | 0.640041  |
| 42 | 16 | 0 | 4.813334   | -0.036293 | -0.156309 |
| 43 | 6  | 0 | 5.921601   | 1.296211  | 0.248829  |
| 44 | 1  | 0 | 5.693387   | 1.665576  | 1.226776  |
| 45 | 6  | 0 | 7.372937   | 0.782036  | 0.219701  |
| 46 | 6  | 0 | 8.111974   | 0.837703  | -0.969752 |
| 47 | 6  | 0 | 7.954664   | 0.258182  | 1.382156  |
| 48 | 6  | 0 | 9.432362   | 0.368938  | -0.996917 |
| 49 | 1  | 0 | 7.668026   | 1.238039  | -1.857193 |
| 50 | 6  | 0 | 9.275216   | -0.210064 | 1.354992  |
| 51 | 1  | 0 | 7.390665   | 0.215692  | 2.290491  |
| 52 | 6  | 0 | 10.014020  | -0.154647 | 0.165564  |
| 53 | 1  | 0 | 9.996330   | 0.410782  | -1.905258 |
| 54 | 1  | 0 | 9.719467   | -0.609950 | 2.242412  |
| 55 | 35 | 0 | 11.813798  | -0.792859 | 0.129134  |
| 56 | 1  | 0 | 5.807915   | 2.084680  | -0.465542 |

-----  
Rotational constants (GHZ): 0.4582201 0.0149855 0.0147345

Standard basis: 6-311++G(d,p) (5D, 7F)

There are 936 symmetry adapted basis functions of A symmetry.

Integral buffers will be 131072 words long.

Raffenetti 2 integral format.

Two-electron integral symmetry is turned on.

936 basis functions, 1494 primitive gaussians, 972 cartesian basis functions

139 alpha electrons 138 beta electrons

nuclear repulsion energy 3469.7887691376 Hartrees.

NAtoms= 56 NActive= 56 NUniq= 56 SFac= 1.00D+00 NATfMM= 60 NAOKFM=F Big=F

-----  
Polarizable Continuum Model (PCM)  
=====

Model : PCM.  
Atomic radii : UFF (Universal Force Field).  
Polarization charges : Total charges.  
Charge compensation : None.  
Solution method : Matrix inversion.  
Cavity type : Scaled VdW (van der Waals Surface) (Alpha=1.100).  
Cavity algorithm : GePol (No added spheres)  
Default sphere list used, NSphG = 56.  
Lebedev-Laikov grids with approx. 5.0 points / Ang\*\*2.  
Smoothing algorithm: Karplus/York (Gamma=1.0000).  
Polarization charges: spherical gaussians, with  
point-specific exponents (IZeta = 3).  
Self-potential: point-specific (ISelfS = 7).  
Self-field : sphere-specific E.n sum rule (ISelfD = 2).  
Solvent : DiMethylSulfoxide, Eps = 46.826000 Eps(inf) = 2.007889

-----**6b.out**-----  
Title Card Required  
-----

Charge = 0 Multiplicity = 1

Symbolic Z-Matrix:

|   |          |          |          |
|---|----------|----------|----------|
| C | 8.39915  | 1.39148  | -0.47886 |
| C | 7.02092  | 1.13959  | -0.4486  |
| C | 6.53039  | 0.00443  | 0.21072  |
| C | 7.41809  | -0.87883 | 0.83981  |
| C | 8.79632  | -0.62696 | 0.80955  |
| C | 9.28687  | 0.50819  | 0.15019  |
| H | 6.34313  | 1.81398  | -0.92891 |
| H | 7.04354  | -1.74553 | 1.34324  |
| O | 8.89966  | 2.54983  | -1.15163 |
| O | 10.69325 | 0.76516  | 0.11925  |
| O | 9.70212  | -1.52827 | 1.45149  |
| C | 9.05286  | -2.14163 | 2.56825  |
| H | 8.1934   | -2.68118 | 2.22896  |
| H | 9.73062  | -2.81601 | 3.04861  |
| H | 8.74874  | -1.38665 | 3.26281  |
| C | 11.40521 | -0.47442 | 0.15744  |
| H | 11.15833 | -0.99999 | 1.05618  |
| H | 11.13248 | -1.06862 | -0.68958 |
| H | 12.45754 | -0.28218 | 0.1343   |
| C | 8.96165  | 3.64461  | -0.23374 |
| H | 9.61313  | 3.39374  | 0.57715  |
| H | 9.33619  | 4.51134  | -0.73714 |
| H | 7.98202  | 3.84793  | 0.14558  |
| C | 5.01586  | -0.27241 | 0.24396  |

|    |           |          |          |
|----|-----------|----------|----------|
| H  | 4.84714   | -1.3281  | 0.28807  |
| H  | 4.58692   | 0.19369  | 1.10632  |
| O  | 4.40822   | 0.25849  | -0.93665 |
| C  | 3.00191   | 0.00118  | -0.90574 |
| C  | 2.13193   | 0.93199  | -0.32211 |
| C  | 2.49373   | -1.18182 | -1.45906 |
| C  | 0.75377   | 0.67974  | -0.29168 |
| H  | 2.51995   | 1.83528  | 0.10028  |
| C  | 1.11556   | -1.43407 | -1.42865 |
| H  | 3.15798   | -1.89248 | -1.90476 |
| C  | 0.24559   | -0.50331 | -0.84492 |
| H  | 0.08951   | 1.39042  | 0.15396  |
| H  | 0.72754   | -2.33732 | -1.8511  |
| C  | -1.26886  | -0.78055 | -0.81141 |
| C  | -3.34482  | -0.7897  | -0.173   |
| N  | -1.81817  | -1.84606 | -1.29559 |
| N  | -3.15393  | -1.85195 | -0.88481 |
| O  | -2.23155  | 0.1087   | -0.23458 |
| C  | -4.61867  | -0.52465 | 0.65077  |
| H  | -4.49563  | -0.92331 | 1.63608  |
| C  | -5.82131  | -1.20315 | -0.03104 |
| O  | -5.65306  | -2.25286 | -0.70438 |
| C  | -7.22984  | -0.59703 | 0.11115  |
| C  | -7.4172   | 0.57193  | 0.86105  |
| C  | -8.32424  | -1.2144  | -0.50937 |
| C  | -8.69896  | 1.12355  | 0.99039  |
| H  | -6.5816   | 1.0433   | 1.33486  |
| C  | -9.606    | -0.66278 | -0.38004 |
| H  | -8.18119  | -2.10695 | -1.08191 |
| C  | -9.79335  | 0.5062   | 0.36983  |
| H  | -8.84201  | 2.01608  | 1.56294  |
| H  | -10.4416  | -1.13414 | -0.85384 |
| Br | -11.54028 | 1.25804  | 0.5461   |
| H  | -4.7912   | 0.5296   | 0.71155  |

Stoichiometry C<sub>26</sub>H<sub>23</sub>BrN<sub>2</sub>O<sub>6</sub>

Framework group C1[X(C<sub>26</sub>H<sub>23</sub>BrN<sub>2</sub>O<sub>6</sub>)]

Deg. of freedom 168

Full point group C1 NOp 1

Largest Abelian subgroup C1 NOp 1

Largest concise Abelian subgroup C1 NOp 1

Standard orientation:

| Center<br>Number | Atomic<br>Number | Atomic<br>Type | Coordinates (Angstroms) |           |           |
|------------------|------------------|----------------|-------------------------|-----------|-----------|
|                  |                  |                | X                       | Y         | Z         |
| 1                | 6                | 0              | 8.416391                | 1.390329  | -0.481347 |
| 2                | 6                | 0              | 7.038189                | 1.138250  | -0.451076 |
| 3                | 6                | 0              | 6.547707                | 0.003819  | 0.209526  |
| 4                | 6                | 0              | 7.435410                | -0.878530 | 0.839878  |
| 5                | 6                | 0              | 8.813613                | -0.626475 | 0.809601  |
| 6                | 6                | 0              | 9.304115                | 0.507945  | 0.148964  |
| 7                | 1                | 0              | 6.360394                | 1.811949  | -0.932345 |



|    |    |   |            |           |           |
|----|----|---|------------|-----------|-----------|
| 8  | 1  | 0 | 7.060898   | -1.744682 | 1.344284  |
| 9  | 8  | 0 | 8.916853   | 2.547943  | -1.155417 |
| 10 | 8  | 0 | 10.710459  | 0.765102  | 0.118014  |
| 11 | 8  | 0 | 9.719419   | -1.526855 | 1.452827  |
| 12 | 6  | 0 | 9.070019   | -2.138965 | 2.570199  |
| 13 | 1  | 0 | 8.210721   | -2.679065 | 2.231377  |
| 14 | 1  | 0 | 9.747792   | -2.812653 | 3.051519  |
| 15 | 1  | 0 | 8.765629   | -1.383188 | 3.263776  |
| 16 | 6  | 0 | 11.422614  | -0.474313 | 0.157860  |
| 17 | 1  | 0 | 11.175631  | -0.998824 | 1.057185  |
| 18 | 1  | 0 | 11.150158  | -1.069584 | -0.688499 |
| 19 | 1  | 0 | 12.474921  | -0.281926 | 0.134706  |
| 20 | 6  | 0 | 8.978477   | 3.643849  | -0.238846 |
| 21 | 1  | 0 | 9.629826   | 3.394070  | 0.572481  |
| 22 | 1  | 0 | 9.352976   | 4.510025  | -0.743218 |
| 23 | 1  | 0 | 7.998730   | 3.847467  | 0.140019  |
| 24 | 6  | 0 | 5.033212   | -0.273219 | 0.242776  |
| 25 | 1  | 0 | 4.864657   | -1.328884 | 0.288142  |
| 26 | 1  | 0 | 4.604020   | 0.193852  | 1.104483  |
| 27 | 8  | 0 | 4.425735   | 0.256136  | -0.938601 |
| 28 | 6  | 0 | 3.019466   | -0.001358 | -0.907677 |
| 29 | 6  | 0 | 2.149212   | 0.930026  | -0.325364 |
| 30 | 6  | 0 | 2.511585   | -1.185114 | -1.459669 |
| 31 | 6  | 0 | 0.771079   | 0.677589  | -0.294923 |
| 32 | 1  | 0 | 2.536992   | 1.833890  | 0.096010  |
| 33 | 6  | 0 | 1.133453   | -1.437546 | -1.429237 |
| 34 | 1  | 0 | 3.176047   | -1.896202 | -1.904355 |
| 35 | 6  | 0 | 0.263210   | -0.506216 | -0.846828 |
| 36 | 1  | 0 | 0.106612   | 1.388703  | 0.149715  |
| 37 | 1  | 0 | 0.745667   | -2.341376 | -1.850676 |
| 38 | 6  | 0 | -1.251206  | -0.783660 | -0.813298 |
| 39 | 6  | 0 | -3.327293  | -0.792368 | -0.175323 |
| 40 | 7  | 0 | -1.800233  | -1.849846 | -1.296300 |
| 41 | 7  | 0 | -3.136087  | -1.855449 | -0.885799 |
| 42 | 8  | 0 | -2.214161  | 0.106135  | -0.237755 |
| 43 | 6  | 0 | -4.601365  | -0.526519 | 0.647858  |
| 44 | 1  | 0 | -4.478471  | -0.923967 | 1.633674  |
| 45 | 6  | 0 | -5.803748  | -1.206045 | -0.033384 |
| 46 | 8  | 0 | -5.635185  | -2.256542 | -0.705409 |
| 47 | 6  | 0 | -7.212409  | -0.599976 | 0.107771  |
| 48 | 6  | 0 | -7.400112  | 0.569866  | 0.856209  |
| 49 | 6  | 0 | -8.306580  | -1.218278 | -0.512230 |
| 50 | 6  | 0 | -8.681986  | 1.121430  | 0.984605  |
| 51 | 1  | 0 | -6.564689  | 1.041939  | 1.329622  |
| 52 | 6  | 0 | -9.588454  | -0.666705 | -0.383841 |
| 53 | 1  | 0 | -8.163266  | -2.111499 | -1.083649 |
| 54 | 6  | 0 | -9.776152  | 0.503152  | 0.364573  |
| 55 | 1  | 0 | -8.825309  | 2.014634  | 1.556043  |
| 56 | 1  | 0 | -10.423880 | -1.138774 | -0.857243 |
| 57 | 35 | 0 | -11.523239 | 1.254921  | 0.539554  |
| 58 | 1  | 0 | -4.774071  | 0.527776  | 0.707317  |

---

Rotational constants (GHZ): 0.3685246 0.0154712 0.0152030  
 Standard basis: 6-311++G(d,p) (5D, 7F)  
 There are 957 symmetry adapted basis functions of A symmetry.  
 Integral buffers will be 131072 words long.  
 Raffenetti 2 integral format.  
 Two-electron integral symmetry is turned on.  
 957 basis functions, 1525 primitive gaussians, 994 cartesian basis functions  
 138 alpha electrons 138 beta electrons  
 nuclear repulsion energy 3481.0360156751 Hartrees.  
 NAtoms= 58 NActive= 58 NUniq= 58 SFac= 1.00D+00 NAtFMM= 60 NAOKFM=F Big=F

---



---

#### Polarizable Continuum Model (PCM)

---



---

Model : PCM.  
 Atomic radii : UFF (Universal Force Field).  
 Polarization charges : Total charges.  
 Charge compensation : None.  
 Solution method : Matrix inversion.  
 Cavity type : Scaled VdW (van der Waals Surface) (Alpha=1.100).  
 Cavity algorithm : GePol (No added spheres)  
 Default sphere list used, NSphG= 58.  
 Lebedev-Laikov grids with approx. 5.0 points / Ang\*\*2.  
 Smoothing algorithm: Karplus/York (Gamma=1.0000).  
 Polarization charges: spherical gaussians, with  
 point-specific exponents (IZeta= 3).  
 Self-potential: point-specific (ISelfS= 7).  
 Self-field : sphere-specific E.n sum rule (ISelfD= 2).  
 Solvent : DiMethylSulfoxide, Eps= 46.826000 Eps(inf)= 2.007889

---

#### R16b.out

---

Title Card Required

---

Charge = 0 Multiplicity = 2

Symbolic Z-Matrix:

|   |          |          |          |
|---|----------|----------|----------|
| C | -3.79103 | -2.04127 | 0.1557   |
| C | -2.3898  | -2.05614 | 0.14061  |
| C | -1.67793 | -0.85835 | -0.00921 |
| C | -2.36728 | 0.35431  | -0.14392 |
| C | -3.76851 | 0.36919  | -0.12885 |
| C | -4.4804  | -0.82861 | 0.02093  |
| H | -1.86346 | -2.98203 | 0.24348  |
| H | -1.82373 | 1.26885  | -0.25828 |
| O | -4.51741 | -3.26353 | 0.30861  |
| O | -5.91023 | -0.81342 | 0.03624  |
| O | -4.4719  | 1.60663  | -0.26631 |
| C | -3.68181 | 2.66704  | 0.27793  |
| H | -2.75184 | 2.72508  | -0.24808 |
| H | -4.20813 | 3.59295  | 0.17511  |
| H | -3.49427 | 2.47653  | 1.314    |
| C | -6.38396 | 0.27211  | -0.76507 |

|    |          |          |          |
|----|----------|----------|----------|
| H  | -6.01321 | 1.19502  | -0.3705  |
| H  | -6.0393  | 0.15007  | -1.77066 |
| H  | -7.45384 | 0.2835   | -0.75363 |
| C  | -4.74305 | -3.51325 | 1.69844  |
| H  | -5.30816 | -2.70755 | 2.11844  |
| H  | -5.28659 | -4.42779 | 1.81285  |
| H  | -3.80324 | -3.59127 | 2.20397  |
| C  | -0.13812 | -0.87468 | -0.02582 |
| H  | 0.22056  | -0.06992 | -0.63295 |
| H  | 0.23056  | -0.76034 | 0.97213  |
| O  | 0.31963  | -2.11814 | -0.56355 |
| C  | 1.74946  | -2.13307 | -0.57909 |
| C  | 2.45719  | -2.61979 | 0.52821  |
| C  | 2.44294  | -1.66095 | -1.70163 |
| C  | 3.85843  | -2.63427 | 0.51302  |
| H  | 1.92769  | -2.98035 | 1.38525  |
| C  | 3.84417  | -1.67544 | -1.71682 |
| H  | 1.90255  | -1.28941 | -2.54712 |
| C  | 4.55191  | -2.16206 | -0.60948 |
| H  | 4.39881  | -3.00587 | 1.35849  |
| H  | 4.37367  | -1.31495 | -2.57389 |
| C  | 6.09173  | -2.17788 | -0.62613 |
| C  | 8.15695  | -2.11136 | 0.04293  |
| N  | 6.80686  | -1.75878 | -1.6183  |
| N  | 8.13573  | -1.71598 | -1.1878  |
| O  | 6.89785  | -2.65237 | 0.45797  |
| C  | 9.39101  | -2.00638 | 0.95816  |
| H  | 9.3784   | -1.06541 | 1.46739  |
| C  | 10.67088 | -2.11309 | 0.10838  |
| O  | 10.67103 | -1.70689 | -1.08266 |
| C  | 11.95054 | -2.71693 | 0.71617  |
| C  | 11.95036 | -3.16924 | 2.04257  |
| C  | 13.11521 | -2.81413 | -0.05714 |
| C  | 13.11484 | -3.7188  | 2.59564  |
| H  | 11.06111 | -3.09499 | 2.63303  |
| C  | 14.27968 | -3.3637  | 0.49593  |
| H  | 13.11535 | -2.46875 | -1.06987 |
| C  | 14.27949 | -3.81603 | 1.82232  |
| H  | 13.1147  | -4.06416 | 3.60837  |
| H  | 15.16893 | -3.43794 | -0.09452 |
| Br | 15.86657 | -4.56507 | 2.57612  |

Stoichiometry C<sub>26</sub>H<sub>22</sub>BrN<sub>2</sub>O<sub>6</sub>(2)

Framework group C1[X(C<sub>26</sub>H<sub>22</sub>BrN<sub>2</sub>O<sub>6</sub>)]

Deg. of freedom 165

Full point group C1 NOp 1

Largest Abelian subgroup C1 NOp 1

Largest concise Abelian subgroup C1 NOp 1

Standard orientation:

-----  
 Center Atomic Atomic Coordinates (Angstroms)  
 Number Number Type X Y Z  
 -----

|    |   |   |           |           |           |
|----|---|---|-----------|-----------|-----------|
| 1  | 6 | 0 | 8.399153  | 1.391479  | -0.478860 |
| 2  | 6 | 0 | 7.020917  | 1.139585  | -0.448604 |
| 3  | 6 | 0 | 6.530392  | 0.004430  | 0.210721  |
| 4  | 6 | 0 | 7.418087  | -0.878828 | 0.839812  |
| 5  | 6 | 0 | 8.796324  | -0.626958 | 0.809549  |
| 6  | 6 | 0 | 9.286869  | 0.508186  | 0.150189  |
| 7  | 1 | 0 | 6.343129  | 1.813978  | -0.928910 |
| 8  | 1 | 0 | 7.043542  | -1.745532 | 1.343243  |
| 9  | 8 | 0 | 8.899659  | 2.549832  | -1.151628 |
| 10 | 8 | 0 | 10.693247 | 0.765155  | 0.119254  |
| 11 | 8 | 0 | 9.702121  | -1.528265 | 1.451488  |
| 12 | 6 | 0 | 9.052859  | -2.141629 | 2.568252  |
| 13 | 1 | 0 | 8.193402  | -2.681178 | 2.228955  |
| 14 | 1 | 0 | 9.730625  | -2.816011 | 3.048609  |
| 15 | 1 | 0 | 8.748737  | -1.386647 | 3.262812  |
| 16 | 6 | 0 | 11.405211 | -0.474422 | 0.157441  |
| 17 | 1 | 0 | 11.158334 | -0.999987 | 1.056180  |
| 18 | 1 | 0 | 11.132480 | -1.068620 | -0.689583 |
| 19 | 1 | 0 | 12.457544 | -0.282177 | 0.134298  |
| 20 | 6 | 0 | 8.961654  | 3.644612  | -0.233738 |
| 21 | 1 | 0 | 9.613134  | 3.393742  | 0.577147  |
| 22 | 1 | 0 | 9.336185  | 4.511341  | -0.737135 |
| 23 | 1 | 0 | 7.982020  | 3.847927  | 0.145582  |
| 24 | 6 | 0 | 5.015860  | -0.272405 | 0.243955  |
| 25 | 1 | 0 | 4.847144  | -1.328097 | 0.288073  |
| 26 | 1 | 0 | 4.586925  | 0.193687  | 1.106321  |
| 27 | 8 | 0 | 4.408218  | 0.258485  | -0.936648 |
| 28 | 6 | 0 | 3.001914  | 0.001179  | -0.905740 |
| 29 | 6 | 0 | 2.131934  | 0.931994  | -0.322110 |
| 30 | 6 | 0 | 2.493726  | -1.181823 | -1.459063 |
| 31 | 6 | 0 | 0.753766  | 0.679742  | -0.291684 |
| 32 | 1 | 0 | 2.519948  | 1.835283  | 0.100281  |
| 33 | 6 | 0 | 1.115560  | -1.434070 | -1.428646 |
| 34 | 1 | 0 | 3.157979  | -1.892476 | -1.904755 |
| 35 | 6 | 0 | 0.245590  | -0.503309 | -0.844921 |
| 36 | 1 | 0 | 0.089508  | 1.390422  | 0.153959  |
| 37 | 1 | 0 | 0.727539  | -2.337324 | -1.851102 |
| 38 | 6 | 0 | -1.268864 | -0.780550 | -0.811407 |
| 39 | 6 | 0 | -3.344817 | -0.789700 | -0.173004 |
| 40 | 7 | 0 | -1.818165 | -1.846060 | -1.295590 |
| 41 | 7 | 0 | -3.153932 | -1.851947 | -0.884813 |
| 42 | 8 | 0 | -2.231553 | 0.108699  | -0.234579 |
| 43 | 6 | 0 | -4.618672 | -0.524648 | 0.650770  |
| 44 | 1 | 0 | -4.495639 | -0.923293 | 1.636084  |
| 45 | 6 | 0 | -5.821308 | -1.203152 | -0.031043 |
| 46 | 8 | 0 | -5.653057 | -2.252857 | -0.704381 |
| 47 | 6 | 0 | -7.229842 | -0.597028 | 0.111147  |
| 48 | 6 | 0 | -7.417198 | 0.571933  | 0.861047  |
| 49 | 6 | 0 | -8.324244 | -1.214400 | -0.509374 |
| 50 | 6 | 0 | -8.698956 | 1.123546  | 0.990385  |
| 51 | 1 | 0 | -6.581599 | 1.043295  | 1.334857  |
| 52 | 6 | 0 | -9.606002 | -0.662777 | -0.380042 |

|    |    |   |            |           |           |
|----|----|---|------------|-----------|-----------|
| 53 | 1  | 0 | -8.181194  | -2.106948 | -1.081909 |
| 54 | 6  | 0 | -9.793353  | 0.506199  | 0.369834  |
| 55 | 1  | 0 | -8.842014  | 2.016078  | 1.562940  |
| 56 | 1  | 0 | -10.441604 | -1.134136 | -0.853841 |
| 57 | 35 | 0 | -11.540282 | 1.258035  | 0.546099  |

-----  
 Rotational constants (GHZ): 0.3687222 0.0154809 0.0152123

Standard basis: 6-311++G(d,p) (5D, 7F)

There are 950 symmetry adapted basis functions of A symmetry.

Integral buffers will be 131072 words long.

Raffenetti 2 integral format.

Two-electron integral symmetry is turned on.

950 basis functions, 1516 primitive gaussians, 987 cartesian basis functions

138 alpha electrons 137 beta electrons

nuclear repulsion energy 3453.1760965192 Hartrees.

NAtoms= 57 NActive= 57 NUniq= 57 SFac= 1.00D+00 NAtFMM= 60 NAOKFM=F Big=F

-----  
 Polarizable Continuum Model (PCM)

=====  
 Model : PCM.

Atomic radii : UFF (Universal Force Field).

Polarization charges : Total charges.

Charge compensation : None.

Solution method : Matrix inversion.

Cavity type : Scaled VdW (van der Waals Surface) (Alpha=1.100).

Cavity algorithm : GePol (No added spheres)

Default sphere list used, NSphG= 57.

Lebedev-Laikov grids with approx. 5.0 points / Ang\*\*2.

Smoothing algorithm: Karplus/York (Gamma=1.0000).

Polarization charges: spherical gaussians, with  
 point-specific exponents (IZeta= 3).

Self-potential: point-specific (ISelfS= 7).

Self-field : sphere-specific E.n sum rule (ISelfD= 2).

Solvent : DiMethylSulfoxide, Eps= 46.826000 Eps(inf)= 2.007889

-----  
**r26b.out**

-----  
 Title Card Required

-----  
 Charge = 0 Multiplicity = 2

Symbolic Z-Matrix:

|   |          |          |          |
|---|----------|----------|----------|
| C | -3.23876 | -2.19773 | 0.62514  |
| C | -1.89106 | -1.89804 | 0.38402  |
| C | -1.53    | -0.63336 | -0.09987 |
| C | -2.51733 | 0.33186  | -0.34288 |
| C | -3.86515 | 0.03213  | -0.10072 |
| C | -4.2255  | -1.23281 | 0.38334  |
| H | -1.13781 | -2.63493 | 0.56917  |
| H | -2.24218 | 1.29763  | -0.71318 |
| O | -3.6087  | -3.48817 | 1.1179   |
| O | -5.60018 | -1.53951 | 0.63098  |
| O | -4.87326 | 1.01646  | -0.34707 |

|    |          |          |          |
|----|----------|----------|----------|
| C  | -4.32644 | 2.32196  | -0.1429  |
| H  | -3.50768 | 2.47451  | -0.81454 |
| H  | -5.08097 | 3.05813  | -0.32762 |
| H  | -3.98162 | 2.41018  | 0.86605  |
| C  | -6.426   | -0.79597 | -0.26916 |
| H  | -6.26309 | 0.25107  | -0.12067 |
| H  | -6.17896 | -1.056   | -1.2773  |
| H  | -7.45408 | -1.02696 | -0.08297 |
| C  | -3.6152  | -3.46943 | 2.54759  |
| H  | -4.31874 | -2.74027 | 2.8916   |
| H  | -3.89345 | -4.43478 | 2.91533  |
| H  | -2.63857 | -3.21926 | 2.90574  |
| C  | -0.0491  | -0.30278 | -0.36516 |
| H  | 0.55127  | 0.12335  | 0.4112   |
| O  | 0.52327  | -0.56476 | -1.64942 |
| C  | 1.92049  | -0.8345  | -1.50446 |
| C  | 2.40469  | -1.41773 | -0.32566 |
| C  | 2.80611  | -0.51445 | -2.54255 |
| C  | 3.77465  | -1.67996 | -0.18476 |
| H  | 1.72893  | -1.66278 | 0.46692  |
| C  | 4.17558  | -0.77657 | -2.40166 |
| H  | 2.43667  | -0.06982 | -3.44285 |
| C  | 4.6601   | -1.35832 | -1.22239 |
| H  | 4.1443   | -2.12574 | 0.71506  |
| H  | 4.85119  | -0.5322  | -3.19462 |
| C  | 6.16572  | -1.64339 | -1.06622 |
| C  | 8.12393  | -1.9186  | -0.16768 |
| N  | 7.04837  | -1.37622 | -1.97232 |
| N  | 8.30857  | -1.55289 | -1.39395 |
| O  | 6.75197  | -2.22815 | 0.10192  |
| C  | 9.24686  | -2.00405 | 0.88352  |
| H  | 9.33651  | -1.06346 | 1.38557  |
| C  | 10.5794  | -2.34346 | 0.1891   |
| O  | 10.78501 | -1.96985 | -0.99472 |
| C  | 11.6605  | -3.14021 | 0.94439  |
| C  | 11.43077 | -3.55676 | 2.26258  |
| C  | 12.87369 | -3.44866 | 0.31385  |
| C  | 12.41295 | -4.28305 | 2.94975  |
| H  | 10.50543 | -3.32026 | 2.74448  |
| C  | 13.85604 | -4.17514 | 1.00072  |
| H  | 13.04996 | -3.12975 | -0.6921  |
| C  | 13.62546 | -4.59246 | 2.31861  |
| H  | 12.23696 | -4.60145 | 3.95619  |
| H  | 14.78224 | -4.41108 | 0.51907  |
| Br | 14.96356 | -5.58288 | 3.2547   |
| H  | 9.01152  | -2.76761 | 1.59515  |

Stoichiometry C<sub>26</sub>H<sub>22</sub>BrN<sub>2</sub>O<sub>6</sub>(2)

Framework group C1[X(C<sub>26</sub>H<sub>22</sub>BrN<sub>2</sub>O<sub>6</sub>)]

Deg. of freedom 165

Full point group C1 NOp 1

Largest Abelian subgroup C1 NOp 1

Largest concise Abelian subgroup C1 NOp 1

## Standard orientation:

| Center<br>Number | Atomic<br>Number | Atomic<br>Type | Coordinates (Angstroms) |           |           |
|------------------|------------------|----------------|-------------------------|-----------|-----------|
|                  |                  |                | X                       | Y         | Z         |
| 1                | 6                | 0              | 7.670011                | 1.879897  | -0.630456 |
| 2                | 6                | 0              | 6.446584                | 1.224597  | -0.435351 |
| 3                | 6                | 0              | 6.407425                | 0.002701  | 0.249754  |
| 4                | 6                | 0              | 7.592424                | -0.564073 | 0.739698  |
| 5                | 6                | 0              | 8.815846                | 0.092063  | 0.545225  |
| 6                | 6                | 0              | 8.854251                | 1.314097  | -0.139899 |
| 7                | 1                | 0              | 5.542443                | 1.657123  | -0.809687 |
| 8                | 1                | 0              | 7.563164                | -1.497640 | 1.262328  |
| 9                | 8                | 0              | 7.711557                | 3.126263  | -1.330280 |
| 10               | 8                | 0              | 10.101777               | 1.984426  | -0.338599 |
| 11               | 8                | 0              | 10.025355               | -0.484551 | 1.045713  |
| 12               | 6                | 0              | 9.740088                | -1.248786 | 2.220273  |
| 13               | 1                | 0              | 9.047091                | -2.027502 | 1.979269  |
| 14               | 1                | 0              | 10.645274               | -1.680266 | 2.594220  |
| 15               | 1                | 0              | 9.314597                | -0.610595 | 2.966145  |
| 16               | 6                | 0              | 11.154568               | 1.020424  | -0.424641 |
| 17               | 1                | 0              | 11.195543               | 0.454807  | 0.482718  |
| 18               | 1                | 0              | 10.968917               | 0.361954  | -1.247410 |
| 19               | 1                | 0              | 12.087111               | 1.523479  | -0.573840 |
| 20               | 6                | 0              | 7.568375                | 4.201714  | -0.398982 |
| 21               | 1                | 0              | 8.365809                | 4.165113  | 0.313582  |
| 22               | 1                | 0              | 7.601019                | 5.133746  | -0.923210 |
| 23               | 1                | 0              | 6.631428                | 4.111184  | 0.109547  |
| 24               | 6                | 0              | 5.063379                | -0.718403 | 0.464888  |
| 25               | 1                | 0              | 4.483766                | -0.519117 | 1.341870  |
| 26               | 8                | 0              | 4.590500                | -1.654859 | -0.507227 |
| 27               | 6                | 0              | 3.160355                | -1.677596 | -0.493492 |
| 28               | 6                | 0              | 2.442947                | -0.527520 | -0.137345 |
| 29               | 6                | 0              | 2.476093                | -2.851809 | -0.836097 |
| 30               | 6                | 0              | 1.041314                | -0.552134 | -0.122959 |
| 31               | 1                | 0              | 2.964851                | 0.369321  | 0.123748  |
| 32               | 6                | 0              | 1.074950                | -2.876387 | -0.821683 |
| 33               | 1                | 0              | 3.023480                | -3.729749 | -1.108684 |
| 34               | 6                | 0              | 0.357481                | -1.726939 | -0.464078 |
| 35               | 1                | 0              | 0.493524                | 0.326106  | 0.148464  |
| 36               | 1                | 0              | 0.553093                | -3.773076 | -1.083546 |
| 37               | 6                | 0              | -1.182457               | -1.754905 | -0.445040 |
| 38               | 6                | 0              | -3.240235               | -1.321963 | 0.098832  |
| 39               | 7                | 0              | -1.888866               | -2.795759 | -0.743467 |
| 40               | 7                | 0              | -3.213077               | -2.517326 | -0.393059 |
| 41               | 8                | 0              | -1.998292               | -0.633798 | -0.087687 |
| 42               | 6                | 0              | -4.462866               | -0.711237 | 0.809805  |
| 43               | 1                | 0              | -4.410451               | -0.927301 | 1.856394  |
| 44               | 6                | 0              | -5.754385               | -1.314683 | 0.225911  |
| 45               | 8                | 0              | -5.750542               | -2.487147 | -0.230828 |
| 46               | 6                | 0              | -7.050894               | -0.482511 | 0.201509  |
| 47               | 6                | 0              | -7.054515               | 0.823526  | 0.709606  |

|    |    |   |            |           |           |
|----|----|---|------------|-----------|-----------|
| 48 | 6  | 0 | -8.226801  | -1.030979 | -0.328581 |
| 49 | 6  | 0 | -8.233005  | 1.581804  | 0.686208  |
| 50 | 1  | 0 | -6.157470  | 1.241835  | 1.115480  |
| 51 | 6  | 0 | -9.405467  | -0.272846 | -0.352301 |
| 52 | 1  | 0 | -8.224751  | -2.028491 | -0.715457 |
| 53 | 6  | 0 | -9.408385  | 1.033620  | 0.154942  |
| 54 | 1  | 0 | -8.235271  | 2.579310  | 1.073813  |
| 55 | 1  | 0 | -10.303265 | -0.691491 | -0.757506 |
| 56 | 35 | 0 | -11.014122 | 2.067184  | 0.122297  |
| 57 | 1  | 0 | -4.467349  | 0.348709  | 0.663832  |

-----  
 Rotational constants (GHZ): 0.2506246 0.0166910 0.0158778

Standard basis: 6-311++G(d,p) (5D, 7F)

There are 950 symmetry adapted basis functions of A symmetry.

Integral buffers will be 131072 words long.

Raffenetti 2 integral format.

Two-electron integral symmetry is turned on.

950 basis functions, 1516 primitive gaussians, 987 cartesian basis functions

138 alpha electrons 137 beta electrons

nuclear repulsion energy 3462.7881226289 Hartrees.

NAtoms = 57 NActive = 57 NUniq = 57 SFac = 1.00D+00 NATFMM = 60 NAOKFM=F Big=F

-----  
 Polarizable Continuum Model (PCM)

Model : PCM.

Atomic radii : UFF (Universal Force Field).

Polarization charges: Total charges.

Charge compensation: None.

Solution method : Matrix inversion.

Cavity type : Scaled VdW (van der Waals Surface) (Alpha = 1.100).

Cavity algorithm : GePol (No added spheres)

Default sphere list used, NSphG = 57.

Lebedev-Laikov grids with approx. 5.0 points / Ang\*\*2.

Smoothing algorithm: Karplus/York (Gamma = 1.0000).

Polarization charges: spherical gaussians, with  
point-specific exponents (IZeta = 3).

Self-potential: point-specific (ISelfS = 7).

Self-field: sphere-specific E.n sum rule (ISelfD = 2).

Solvent : DiMethylSulfoxide, Eps = 46.826000 Eps(inf) = 2.007889

-----
